# Supplementary material for: Rapid Adaptation and Remote Delivery of Undergraduate Research Training during the COVID-19 Pandemic
Source: MDPI journal article supplement (doi:10.3390/su13116133), 2021-05-29
Supplement: s1 [file s1]

Archive with 3 entries (3 files):
- Copy of Supplementary Material S2_academic data.xlsx
- Copy of Supplementary Material S3_wellness data-1.xlsx
- sustainability-1192282-supplementary S1.pdf
