# Supplementary material for: Rapid Adaptation and Remote Delivery of Undergraduate Research Training during the COVID-19 Pandemic
Source: MDPI journal article supplement (doi:10.3390/su13116133), 2021-05-29
Supplement: s1 [file s1 › Copy of Supplementary Material S2_academic data.xlsx]

## Sheet: ALL Pre- and Post-Program Data
ID#	Gender	USCitizen/Perm Resident	URM?	BEFORE: Select a suitable topic area for study	BEFORE: Articulate a clear purpose for the research	BEFORE: Refine a problem so it can be investigated	BEFORE: Compare major types of studies	BEFORE: Choose an appropriate research design that will answer a set of research questions and/or test a set of hypotheses	BEFORE: Select methods of data collection appropriate to the study	BEFORE: Design the best data analysis strategy for a study	BEFORE: Consult senior researchers for ideas	BEFORE: Participate in generating collaborative research ideas	BEFORE: Discuss ethical issues involved in conducting research	BEFORE: Identify the responsibilities of research institutions in conducting research	BEFORE: Design visual presentations	AFTER: Select a suitable topic area for study	AFTER: Articulate a clear purpose for the research	AFTER: Refine a problem so it can be investigated	AFTER: Compare major types of studies (e.g., case controls, cohort/longitudinal studies, clinical trials)	AFTER: Choose an appropriate research design that will answer a set of research questions and/or test a set of hypotheses	AFTER: Select methods of data collection appropriate to the study	AFTER: Design the best data analysis strategy for a study	AFTER: Consult senior researchers for ideas	AFTER: Participate in generating collaborative research ideas	AFTER: Discuss ethical issues involved in conducting research	AFTER: Identify the responsibilities of research institutions in conducting research	AFTER: Design visual presentations (posters, slides, graphs, pictures)	BEFORE: How knowledgeable are you about careers in biomedical research?	AFTER: How knowledgeable are you currently about careers in biomedical research?	RETRO BEFORE: Please tell us about your level of interest in pursuing a career involving research before and after participation in this program. - My interest in research before this program	RETRO AFTER: Please tell us about your level of interest in pursuing a career involving research before and after participation in this program. - My interest in research now	AFTER: Do you plan on pursuing further education (either immediately or after a break) after you complete your bachelor's degree?	AFTER: Are you considering applying to a Mayo education program?	Indicate your level of agreement with the following statements about the technology and on-line format of the summer program: - Overall, the on-line format of the sessions worked smoothly	Indicate your level of agreement with the following statements about the technology and on-line format of the summer program: - The instructors/facilitators used the technology in ways that helped me learn	Please indicate your overall level of agreement with the following statements about the mentoring that you and/or your small group received during the program My mentor(s)... - were supportive	Please indicate your overall level of agreement with the following statements about the mentoring that you and/or your small group received during the program My mentor(s)... - were encouraging	Please indicate your overall level of agreement with the following statements about the mentoring that you and/or your small group received during the program My mentor(s)... - treated me/us with respect	Please indicate your overall level of agreement with the following statements about the mentoring that you and/or your small group received during the program My mentor(s)... - had enough time for me/my group	Please indicate your overall level of agreement with the following statements about the mentoring that you and/or your small group received during the program My mentor(s)... - showed genuine interest in my/our research ideas	Please indicate your overall level of agreement with the following statements about the mentoring that you and/or your small group received during the program My mentor(s)... - answered my/our questions well	Please indicate your overall level of agreement with the following statements about the mentoring that you and/or your small group received during the program My mentor(s)... - challenged me/us to extend my abilities	Indicate how worthwhile you found the course component(s): - Experimental Design 1	Indicate how worthwhile you found the course component(s): - Experimental Design 2	Indicate how worthwhile you found the course component(s): - Mindfulness	Indicate how worthwhile you found the course component(s): - FunCaTS	Indicate how worthwhile you found the course component(s): - Sample Size Matters	The Dialogue session(s) were engaging	The Dialogue session(s) were worthwhile
001	M	Y	Unknown	3	4	4	2	4	3	3	5	5	4	4	3	5	5	4	4	4	5	4	6	6	4	4	4	Moderately knowledgeable	Very knowledgeable	3	4	Yes	No	Somewhat agree	Somewhat agree	Agree	Agree	Agree	Disagree	Neutral	Agree	Agree	Extremely worthwhile	Extremely worthwhile	Extremely worthwhile	Somewhat worthwhile	Quite worthwhile	Strongly Agree	Strongly Agree
002	M	Y	N	3	4	4	2	3	3	3	4	4	5	5	6	4	5	5	4	4	4	4	6	5	6	6	5	Moderately knowledgeable	Moderately knowledgeable	3	4	I'm not sure yet		Strongly agree	Strongly agree	Strongly Agree	Strongly Agree	Strongly Agree	Strongly Agree	Strongly Agree	Strongly Agree	Strongly Agree	Quite worthwhile	Quite worthwhile	Extremely worthwhile	A little worthwhile	Quite worthwhile	Agree	Neutral
003	F	Y	Y	4	4	4	4	3	3	2	3	3	3	3	3	3	3	3	3	3	3	3	3	3	3	3	3	Slightly knowledgeable	Moderately knowledgeable	3	3	Yes	Yes	Neither agree nor disagree	Neither agree nor disagree	Neutral	Neutral	Neutral	Neutral	Neutral	Neutral	Neutral	Somewhat worthwhile	Somewhat worthwhile	Somewhat worthwhile	Somewhat worthwhile	Somewhat worthwhile	Neutral	Neutral
004	M	Y	N	6	3	4	4	1	1	1	6	6	6	6	6	6	6	3	4	4	4	2	6	6	6	6	6	Moderately knowledgeable	Extremely knowledgeable	3	6	Yes	Yes	Strongly agree	Strongly agree	Strongly Agree	Strongly Agree	Strongly Agree	Strongly Agree	Strongly Agree	Strongly Agree	Strongly Agree	Somewhat worthwhile	Extremely worthwhile	Extremely worthwhile	Extremely worthwhile	Somewhat worthwhile	Strongly Agree	Strongly Agree
005	F	Y	N	4	3	3	5	3	5	4	2	2	4	5	3	5	6	5	6	6	5	6	5	6	6	6	6	Very knowledgeable	Very knowledgeable	3	5	Yes	Yes	Strongly agree	Strongly agree	Strongly Agree	Strongly Agree	Strongly Agree	Strongly Agree	Strongly Agree	Strongly Agree	Strongly Agree	Extremely worthwhile	Extremely worthwhile	Extremely worthwhile	Extremely worthwhile	Extremely worthwhile	Agree	Agree
006	M	Y	N	4	4	3	4	4	3	3	2	2	3	2	4	5	5	4	6	5	4	4	4	5	3	5	3	Moderately knowledgeable	Very knowledgeable	3	4	Yes	Yes	Somewhat agree	Strongly agree	Strongly Agree	Strongly Agree	Strongly Agree	Strongly Agree	Strongly Agree	Strongly Agree	Strongly Agree	Extremely worthwhile	Extremely worthwhile	Extremely worthwhile	Somewhat worthwhile	Quite worthwhile	Strongly Agree	Strongly Agree
007	F	Y	Y	3	5	3	3	3	5	3	5	5	4	2	5	4	5	3	4	3	4	4	6	6	6	6	6	Slightly knowledgeable	Very knowledgeable		3	Yes	Maybe	Strongly agree	Strongly agree	Strongly Agree	Strongly Agree	Strongly Agree	Strongly Agree	Strongly Agree	Strongly Agree	Strongly Agree	Extremely worthwhile	Extremely worthwhile	Extremely worthwhile	A little worthwhile	A little worthwhile	Strongly Agree	Strongly Agree
008	M	Y	N	4	5	3	5	4	3	3	4	4	5	4	4	5	5	5	4	5	5	5	6	6	5	5	5	Moderately knowledgeable	Very knowledgeable	3	4	Yes	Yes	Strongly agree	Strongly agree	Strongly Agree	Strongly Agree	Strongly Agree	Strongly Agree	Strongly Agree	Strongly Agree	Strongly Agree	Quite worthwhile	Quite worthwhile	A little worthwhile	Quite worthwhile	Quite worthwhile	Strongly Agree	Strongly Agree
009	M	N		2	2	2	0	0	0	0	4	4	6	6	3	5	5	5	6	5	5	4	6	6	6	6	5	Moderately knowledgeable	Very knowledgeable	4	6	Yes	Yes	Somewhat agree	Strongly agree	Strongly Agree	Strongly Agree	Strongly Agree	Strongly Agree	Strongly Agree	Strongly Agree	Strongly Agree	Extremely worthwhile	Extremely worthwhile	Extremely worthwhile	Extremely worthwhile	Extremely worthwhile	Strongly Agree	Strongly Agree
010	F	Y	N	5	4	4	4	3	3	3	5	5	6	6	5	6	5	4	3	3	3	3	5	5	6	6	5	Moderately knowledgeable	Moderately knowledgeable	5	5	Yes	Maybe	Somewhat agree	Somewhat agree	Agree	Agree	Agree	Agree	Agree	Agree	Agree			A little worthwhile	A little worthwhile	A little worthwhile	Strongly Agree	Strongly Agree
011	M	Y	N	5	4	4	5	4	5	4	5	5	5	5	5	4	4	4	4	4	4	4	5	5	5	5	5	Slightly knowledgeable	Moderately knowledgeable	2	4	Yes	Yes	Somewhat agree	Somewhat agree	Strongly Agree	Strongly Agree	Strongly Agree	Strongly Agree	Strongly Agree	Strongly Agree	Agree	Quite worthwhile	Quite worthwhile	Extremely worthwhile	Quite worthwhile	Quite worthwhile	Strongly Agree	Strongly Agree
012	M	Y	N	3	4	3	4	4	4	5	3	3	5	4	3	5	6	5	5	5	5	6	5	6	6	6	5	Moderately knowledgeable	Very knowledgeable	4	5	Yes	Yes	Somewhat agree	Strongly agree	Strongly Agree	Strongly Agree	Strongly Agree	Strongly Agree	Strongly Agree	Strongly Agree	Strongly Agree	Extremely worthwhile	Extremely worthwhile	Extremely worthwhile	Quite worthwhile	Quite worthwhile	Strongly Agree	Strongly Agree
013	F	Y	Y	4	4	4	4	2	4	3	5	6	6	6	5	6	6	6	3	4	3	3	6	6	6	6	6	Very knowledgeable	Very knowledgeable	5	6	Yes	Yes	Strongly agree	Strongly agree	Strongly Agree	Strongly Agree	Strongly Agree	Strongly Agree	Strongly Agree	Strongly Agree	Strongly Agree	Extremely worthwhile	Extremely worthwhile	Extremely worthwhile	Quite worthwhile	Extremely worthwhile	Strongly Agree	Strongly Agree
014	M	Y	N	5	4	5	3	3	4	4	5	3	3	2	3	4	3	4	3	4	4	3	5	4	4	4	4	Slightly knowledgeable	Moderately knowledgeable	2	3	Yes	Maybe	Somewhat agree	Somewhat agree	Strongly Agree	Strongly Agree	Strongly Agree	Strongly Agree	Strongly Agree	Strongly Agree	Agree	Somewhat worthwhile	Somewhat worthwhile	Quite worthwhile	Extremely worthwhile	Extremely worthwhile	Disagree	Disagree
015	M	Y	N	5	5	5	4	6	5	5	6	4	6	4	5	4	6	5	4	5	5	4	6	5	5	4	5	Moderately knowledgeable	Moderately knowledgeable	3	3	Yes	Yes	Neither agree nor disagree	Somewhat agree	Strongly Agree	Strongly Agree	Strongly Agree	Agree	Strongly Agree	Agree	Agree	Quite worthwhile	Quite worthwhile	Somewhat worthwhile	Somewhat worthwhile	Somewhat worthwhile	Agree	Agree
016	F	Y	Y	4	4	2	4	4	2	3	3	4	5	2	3	3	5	4	3	3	3	3	4	5	4	5	4	Slightly knowledgeable	Very knowledgeable	4	4	Yes	Yes	Strongly agree	Strongly agree	Strongly Agree	Strongly Agree	Strongly Agree	Strongly Agree	Strongly Agree	Strongly Agree	Strongly Agree	Quite worthwhile	Quite worthwhile	Extremely worthwhile	Somewhat worthwhile	Somewhat worthwhile	Agree	Agree
017	F	Y	Y	3	3	3	3	3	4	3	5	4	4	5	5	5	5	5	5	5	5	5	6	6	6	6	5	Moderately knowledgeable	Very knowledgeable	3	5	Yes	Yes	Somewhat agree	Strongly agree	Strongly Agree	Strongly Agree	Strongly Agree	Strongly Agree	Agree	Strongly Agree	Strongly Agree	Quite worthwhile	Quite worthwhile	Extremely worthwhile	Somewhat worthwhile	Quite worthwhile	Agree	Agree
018	M	Y	Y	5	6	5	5	4	4	4	6	4	5	4	6	6	6	6	6	6	4	5	6	6	6	6	6	Extremely knowledgeable	Extremely knowledgeable	6	6	Yes	Yes	Strongly agree	Strongly agree	Strongly Agree	Strongly Agree	Strongly Agree	Agree	Strongly Agree	Strongly Agree	Strongly Agree	Extremely worthwhile	Quite worthwhile	Quite worthwhile	Quite worthwhile	Somewhat worthwhile	Strongly Agree	Neutral
019	F	Y	N	2	4	4	3	3	2	2	3	2	2	2	3	3	4	4	4	4	4	4	3	3	3	3	4	Moderately knowledgeable	Moderately knowledgeable	4	4	Yes	Yes	Somewhat agree	Strongly agree	Agree	Agree	Agree	Agree	Agree	Agree	Agree	A little worthwhile	A little worthwhile	Quite worthwhile	Somewhat worthwhile	Quite worthwhile	Disagree	Disagree
020	F	Y	Y	3	5	3	5	2	2	2	3	3	5	3	4	4	6	5	5	5	5	5	6	5	6	6	6	Moderately knowledgeable	Very knowledgeable	4	5	Yes	Yes	Neither agree nor disagree	Neither agree nor disagree	Strongly Agree	Strongly Agree	Strongly Agree	Strongly Agree	Strongly Agree	Strongly Agree	Strongly Agree	Quite worthwhile	Quite worthwhile	Quite worthwhile	Quite worthwhile		Neutral	Disagree
021	F	Y	N	3	4	4	5	5	3	3	5	3	3	3	3	3	4	3	5	5	5	5	5	5	5	5	4	Moderately knowledgeable	Moderately knowledgeable	3	5	Yes	Yes	Somewhat agree	Strongly agree	Strongly Agree	Strongly Agree	Strongly Agree	Strongly Agree	Strongly Agree	Strongly Agree	Strongly Agree	Quite worthwhile	Extremely worthwhile	Extremely worthwhile	Extremely worthwhile	Extremely worthwhile	Strongly Agree	Agree
022	F	Y	N	6	5	3	5	3	6	2	5	5	2	1	3	5	5	4	4	3	4	3	5	5	4	3	4	Moderately knowledgeable	Moderately knowledgeable	6	6	Yes	Yes	Neither agree nor disagree	Somewhat agree	Strongly Agree	Strongly Agree	Strongly Agree	Agree	Strongly Agree	Agree	Agree	Quite worthwhile	Somewhat worthwhile	Quite worthwhile	Somewhat worthwhile	Quite worthwhile	Agree	Agree
023	F	N		2	4	2	2	2	3	3	4	3	4	4	5	5	5	5	5	5	5	5	5	5	5	5	5	Moderately knowledgeable	Very knowledgeable	3	5	Yes	Yes	Strongly agree	Strongly agree	Strongly Agree	Strongly Agree	Strongly Agree	Agree	Strongly Agree	Strongly Agree	Strongly Agree	Extremely worthwhile	Extremely worthwhile	Extremely worthwhile	Extremely worthwhile	Extremely worthwhile	Strongly Agree	Strongly Agree
024	F	Y	N	5	5	4	2	3	3	3	5	6	5	5	6	4	6	4	3	5	5	5	6	6	6	6	6	Moderately knowledgeable	Very knowledgeable	6	6	Yes	Yes	Strongly agree	Strongly agree	Strongly Agree	Strongly Agree	Strongly Agree	Strongly Agree	Strongly Agree	Strongly Agree	Strongly Agree	Somewhat worthwhile	Extremely worthwhile	Extremely worthwhile	Not worthwhile at all	Quite worthwhile	Strongly Agree	Neutral
025	F	Y	N	4	4	3	3	3	3	2	2	3	3	3	4	5	4	4	4	4	4	4	5	5	4	3	5	Moderately knowledgeable	Very knowledgeable	3	5	Yes	Maybe	Somewhat agree	Somewhat agree	Strongly Agree	Strongly Agree	Strongly Agree	Strongly Agree	Strongly Agree	Neutral	Strongly Agree	Extremely worthwhile	Extremely worthwhile	Extremely worthwhile	Somewhat worthwhile	Quite worthwhile	Strongly Agree	Strongly Agree
026	F	Y	N	4	4	3	3	3	4	4	5	4	4	5	5	5	5	5	4	4	4	4	5	5	5	5	5	Very knowledgeable	Very knowledgeable	6	6	Yes	Yes	Somewhat agree	Somewhat agree	Strongly Agree	Strongly Agree	Strongly Agree	Strongly Agree	Strongly Agree	Strongly Agree	Strongly Agree	Extremely worthwhile	Extremely worthwhile	Extremely worthwhile	Extremely worthwhile	Extremely worthwhile	Agree	Agree
027	M	Y	N	3	5	2	1	3	5	1	6	5	6	6	5	5	5	5	5	5	5	5	5	6	5	5	5	Moderately knowledgeable	Very knowledgeable	5	5	Yes	Maybe	Somewhat agree	Strongly agree	Strongly Agree	Strongly Agree	Strongly Agree	Strongly Agree	Strongly Agree	Strongly Agree	Strongly Agree	Extremely worthwhile	Extremely worthwhile	Extremely worthwhile	Quite worthwhile	Somewhat worthwhile	Strongly Agree	Agree
028	F	Y	N	3	2	2	3	3	1	0	3	2	3	2	2	3	4	4	3	4	5	4	5	5	5	4	3	Slightly knowledgeable	Very knowledgeable	4	6	Yes	Yes	Somewhat agree	Strongly agree	Strongly Agree	Strongly Agree	Strongly Agree	Strongly Agree	Strongly Agree	Strongly Agree	Strongly Agree	Somewhat worthwhile	Extremely worthwhile	Extremely worthwhile	Quite worthwhile	Extremely worthwhile	Strongly Agree	Strongly Agree
029	M	Y	N	4	3	3	6	4	5	5	5	5	5	5	5	4	5	5	5	4	5	4	6	6	6	6	6	Moderately knowledgeable	Very knowledgeable	4	6	Yes	Yes	Strongly agree	Strongly agree	Strongly Agree	Strongly Agree	Strongly Agree	Strongly Agree	Strongly Agree	Strongly Agree	Strongly Agree	Quite worthwhile	Quite worthwhile	Quite worthwhile	Quite worthwhile	Extremely worthwhile	Strongly Agree	Strongly Agree
030	M	Y	Y	5	3	4	2	3	2	3	6	4	6	6	6	4	5	6	4	6	5	6	6	6	5	6	6	Moderately knowledgeable	Extremely knowledgeable	3	5	Yes	Yes	Strongly agree	Strongly agree	Strongly Agree	Strongly Agree	Strongly Agree	Strongly Agree	Strongly Agree	Agree	Strongly Agree	Extremely worthwhile	Extremely worthwhile	Extremely worthwhile	Extremely worthwhile	Extremely worthwhile	Strongly Agree	Strongly Agree
031	M	Y	N	3	5	4	3	2	3	4	4	5	5	2	3	2	5	4	5	2	4	4	5	4	6	5	3	Moderately knowledgeable	Moderately knowledgeable	5	5	Yes	Yes	Somewhat disagree	Somewhat agree	Agree	Neutral	Strongly Agree	Agree	Strongly Agree	Strongly Agree	Agree	Somewhat worthwhile	Quite worthwhile	Extremely worthwhile	Quite worthwhile	Extremely worthwhile	Agree	Strongly Agree
032	M	Y	unknown	3	4	3	5	4	3	3	4	5	4	5	5	5	4	5	5	5	4	4	5	5	6	5	6	Moderately knowledgeable	Very knowledgeable	3	5	Yes	Yes	Somewhat agree	Strongly agree	Strongly Agree	Strongly Agree	Strongly Agree	Strongly Agree	Strongly Agree	Strongly Agree	Strongly Agree	Somewhat worthwhile	Quite worthwhile	Quite worthwhile	Quite worthwhile	Extremely worthwhile	Agree	Neutral
033	F	Y	Y	3	2	1	3	2	2	3	4	3	3	4	1	5	5	4	3	3	4	5	5	6	6	5	3	Slightly knowledgeable	Very knowledgeable	5	6	Yes	Yes	Somewhat agree	Strongly agree	Neutral	Agree	Strongly Agree	Neutral	Neutral	Agree	Neutral	Somewhat worthwhile	Somewhat worthwhile	Extremely worthwhile	Quite worthwhile	Somewhat worthwhile	Agree	Agree
034	F	Y	N	5	5	5	4	5	5	5	5	5	6	6	6	4	4	4	5	4	4	4	6	6	5	5	5	Very knowledgeable	Very knowledgeable	4	6	Yes	Yes	Strongly agree	Strongly agree	Strongly Agree	Strongly Agree	Strongly Agree	Strongly Agree	Strongly Agree	Strongly Agree	Strongly Agree	Extremely worthwhile	Extremely worthwhile	Extremely worthwhile	Extremely worthwhile	Extremely worthwhile	Strongly Agree	Strongly Agree
035	F	Y	N	3	3	5	4	4	4	4	2	2	5	4	5	5	5	5	4	5	3	4	5	5	5	5	5	Moderately knowledgeable	Moderately knowledgeable	3	5	Yes	Yes	Somewhat agree	Somewhat agree	Strongly Agree	Strongly Agree	Strongly Agree	Strongly Agree	Strongly Agree	Strongly Agree	Strongly Agree	Quite worthwhile	Quite worthwhile	Extremely worthwhile	Somewhat worthwhile	Somewhat worthwhile	Agree	Agree
036	F	Y	N	5	4	4	4	5	4	5	5	5	5	4	4	4	5	4	5	4	4	3	5	5	6	5	6	Moderately knowledgeable	Very knowledgeable	3	5	Yes	Maybe	Strongly agree	Strongly agree	Agree	Agree	Agree	Strongly Disagree	Neutral	Neutral	Strongly Agree	Quite worthwhile	Quite worthwhile	Extremely worthwhile	Extremely worthwhile	Extremely worthwhile	Neutral	Neutral
037	M	Y	N	4	4	3	0	4	4	2	4	3	3	2	3	3	4	3	1	4	4	3	5	4	3	3	4	Slightly knowledgeable	Moderately knowledgeable	2	4	Yes	Yes	Somewhat agree	Somewhat agree	Strongly Agree	Strongly Agree	Strongly Agree	Strongly Agree	Strongly Agree	Strongly Agree	Neutral	Somewhat worthwhile	Somewhat worthwhile	Somewhat worthwhile	Quite worthwhile	Extremely worthwhile	Disagree	Neutral
038	F	Y	N	3	5	3	3	3	2	2	4	4	3	3	2	5	5	4	5	5	3	3	5	5	4	3	3	Moderately knowledgeable	Moderately knowledgeable	6	6	Yes	Yes	Strongly agree	Strongly agree	Strongly Agree	Strongly Agree	Strongly Agree	Strongly Agree	Strongly Agree	Strongly Agree	Strongly Agree	Quite worthwhile	Extremely worthwhile	Not worthwhile at all	Somewhat worthwhile	Quite worthwhile	Neutral	Strongly Disagree
039	F	Y	Y	3	5	3	2	1	1	1	3	4	3	3	2	5	4	3	1	2	3	3	6	4	6	4	5	Moderately knowledgeable	Moderately knowledgeable	3	2	Yes	Yes	Strongly agree	Strongly agree	Strongly Agree	Strongly Agree	Strongly Agree	Strongly Agree	Strongly Agree	Strongly Agree	Strongly Agree	Extremely worthwhile	Extremely worthwhile	Extremely worthwhile			Disagree	Disagree
040	F	Y	N	5	4	3	4	2	2	3	1	2	3	5	4	4	4	4	3	3	3	3	5	6	5	5	5	Slightly knowledgeable	Moderately knowledgeable	3	4	Yes	Yes	Neither agree nor disagree	Somewhat agree	Strongly Agree	Strongly Agree	Strongly Agree	Strongly Agree	Strongly Agree	Strongly Agree	Strongly Agree	Extremely worthwhile	Extremely worthwhile	Quite worthwhile	A little worthwhile	A little worthwhile	Neutral	Disagree
041	M	Y	N	4	4	3	3	4	4	1	2	3	1	1	3	5	4	5	5	5	3	4	5	5	3	4	4	Very knowledgeable	Very knowledgeable	4	6	Yes	Yes	Somewhat agree	Somewhat agree	Strongly Agree	Strongly Agree	Strongly Agree	Strongly Agree	Strongly Agree	Strongly Agree	Strongly Agree	Extremely worthwhile	Extremely worthwhile	Extremely worthwhile	Extremely worthwhile	Extremely worthwhile	Strongly Agree	Strongly Agree
042	F	Y	Y	4	3	2	3	3	3	2	3	2	3	3	3	4	5	3	3	3	3	3	3	3	4	4	5	Moderately knowledgeable	Moderately knowledgeable	5	5	Yes	Yes	Somewhat agree	Somewhat agree	Strongly Agree	Strongly Agree	Strongly Agree	Agree	Strongly Agree	Strongly Agree	Strongly Agree	Quite worthwhile	Quite worthwhile	Extremely worthwhile	A little worthwhile	Somewhat worthwhile	Neutral	Neutral
043	F	Y	N	4	3	2	2	2	3	2	5	5	5	3	3	5	5	4	4	3	4	2	3	4	3	3	4	Moderately knowledgeable	Moderately knowledgeable	3	4	Yes	Yes	Somewhat agree	Somewhat agree	Strongly Agree	Strongly Agree	Strongly Agree	Disagree	Agree	Agree	Neutral	Quite worthwhile	Quite worthwhile	Extremely worthwhile	Extremely worthwhile	Somewhat worthwhile	Agree	Disagree
044	F	Y	Y	4	5	4	4	4	4	4	4	5	5	5	5	6	6	6	6	6	6	6	6	6	6	6	6	Very knowledgeable	Very knowledgeable	6	6	Yes	Yes	Somewhat agree	Somewhat agree	Strongly Agree	Strongly Agree	Strongly Agree	Strongly Agree	Strongly Agree	Strongly Agree	Strongly Agree	Extremely worthwhile	Extremely worthwhile	Extremely worthwhile	Extremely worthwhile	Extremely worthwhile	Strongly Disagree	Strongly Disagree
045	M	Y	N	4	3	2	2	3	2	2	4	4	4	3	4	4	4	3	3	4	3	2			5	5	3	Slightly knowledgeable	Moderately knowledgeable	4	5	Yes	Yes	Strongly agree	Strongly agree	Strongly Agree	Strongly Agree	Strongly Agree	Neutral	Agree	Agree	Neutral	Quite worthwhile	Extremely worthwhile	Quite worthwhile	Quite worthwhile	Quite worthwhile	Agree	Agree
046	M	Y	N	4	4	3	2	2	3	2	4	3	5	4	2	4	4	4	3	4	4	4	5	5	5	4	3	Slightly knowledgeable	Slightly knowledgeable	5	5	Yes	Yes	Somewhat agree	Somewhat agree	Strongly Agree	Strongly Agree	Strongly Agree	Strongly Agree	Strongly Agree	Strongly Agree	Strongly Agree	Quite worthwhile	Quite worthwhile	Quite worthwhile	Quite worthwhile	Quite worthwhile	Agree	Agree
047	F	Y	N	4	4	3	1	3	2	2	4	4	4	4	4	5	5	5	4	4	4	4	5	5	5	5	5	Moderately knowledgeable	Very knowledgeable	6	6	Yes	Yes	Somewhat agree	Somewhat agree	Strongly Agree	Strongly Agree	Strongly Agree	Strongly Agree	Strongly Agree	Strongly Agree	Strongly Agree	Extremely worthwhile	Extremely worthwhile	A little worthwhile	A little worthwhile	Extremely worthwhile	Disagree	Disagree
048	F	Y	N	3	4	3	5	2	2	2	4	4	4	4	3	4	5	4	4	5	5	4	6	6	6	6	5	Moderately knowledgeable	Very knowledgeable	3	5	Yes	Yes	Somewhat disagree	Somewhat agree	Strongly Agree	Strongly Agree	Strongly Agree	Strongly Agree	Strongly Agree	Strongly Agree	Strongly Agree	Extremely worthwhile	Extremely worthwhile	Extremely worthwhile			Strongly Agree	Strongly Agree
049	M	Y	N	4	5	5	4	5	4	5	6	6	6	6	4	4	6	6	5	6	6	6	6	6	6	5	5	Slightly knowledgeable	Moderately knowledgeable	4	5	Yes	Yes	Strongly agree	Strongly agree	Strongly Agree	Strongly Agree	Strongly Agree	Strongly Agree	Strongly Agree	Strongly Agree	Strongly Agree	Extremely worthwhile	Extremely worthwhile	Extremely worthwhile	Somewhat worthwhile	Quite worthwhile	Neutral	Neutral
050	F	Y	N	2	2	1	1	1	1	1	3	3	4	3	3	2	5	5	3	3	3	3	6	5	3	5	5	Moderately knowledgeable	Very knowledgeable	3	5	Yes	Yes	Somewhat agree	Strongly agree	Strongly Agree	Strongly Agree	Strongly Agree	Disagree	Strongly Agree	Strongly Agree	Strongly Agree	Extremely worthwhile	Extremely worthwhile	Somewhat worthwhile			Agree	Agree
051	F	Y	Y	1	3	1	3	1	1	1	4	3	3	1	4	6	5	4	4	5	4	4	6	6	6	4	6	Slightly knowledgeable	Moderately knowledgeable	4	6	Yes	Yes	Somewhat agree	Somewhat disagree	Strongly Agree	Strongly Agree	Strongly Agree	Strongly Agree	Strongly Agree	Strongly Agree	Strongly Agree	Somewhat worthwhile	Somewhat worthwhile	Quite worthwhile	A little worthwhile		Agree	Agree
052	F	N		4	4	3	3	3	3	3	4	4	4	4	4	4	4	5	4	4	5	5	6	5	5	5	5	Moderately knowledgeable	Very knowledgeable	3	6	Yes	Yes	Somewhat agree	Somewhat agree	Strongly Agree	Strongly Agree	Strongly Agree	Neutral	Strongly Agree	Strongly Agree	Strongly Agree	Extremely worthwhile	Extremely worthwhile	Extremely worthwhile	Extremely worthwhile	Somewhat worthwhile	Agree	Strongly Agree
053	M	Y	N	2	3	4	1	1	1	1	3	2	2	1	4	4	4	4	5	5	5	6	6	6	5	6	3	Slightly knowledgeable	Moderately knowledgeable	2	3	Maybe	No	Strongly agree	Strongly agree	Strongly Agree	Strongly Agree	Strongly Agree	Strongly Agree	Strongly Agree	Strongly Agree	Agree	Somewhat worthwhile	Extremely worthwhile	A little worthwhile	Somewhat worthwhile	Somewhat worthwhile	Disagree	Agree
054	F	Y	Y	5	4	4	6	4	5	3	6	6	6	6	5	3	5	4	6	4	5	3	6	6	6	6	6	Very knowledgeable	Very knowledgeable	6	6	Yes	Yes	Strongly agree	Strongly agree	Strongly Agree	Strongly Agree	Strongly Agree	Strongly Agree	Strongly Agree	Strongly Agree	Strongly Agree	Extremely worthwhile	Extremely worthwhile	Extremely worthwhile	Extremely worthwhile	Extremely worthwhile	Neutral	Neutral
055	F	Y	Y	5	5	4	3	3	3	3	5	5	5	5	4	5	5	5	5	5	5	5	5	5	5	5	5	Moderately knowledgeable	Very knowledgeable	4	6	Yes	Yes	Somewhat agree	Strongly agree	Agree	Agree	Agree	Agree	Agree	Agree	Agree	Extremely worthwhile	Extremely worthwhile	Extremely worthwhile	Quite worthwhile	Quite worthwhile	Agree	Agree
056	M	Y	N	5	4	4	5	5	5	5	6	6	6	6	6	5	3	3	4	6	5	5	6	6	6	6	6	Slightly knowledgeable	Very knowledgeable	3	4	Yes	Yes	Strongly agree	Strongly agree	Strongly Agree	Strongly Agree	Strongly Agree	Strongly Agree	Strongly Agree	Strongly Agree	Strongly Agree	Extremely worthwhile	Extremely worthwhile	Quite worthwhile	Quite worthwhile	Somewhat worthwhile	Agree	Neutral
057	F	Y	N	4	5	5	5	3	4	4	4	5	6	6	4	5	5	4	4	5	4	3	5	5	6	6	6	Slightly knowledgeable	Very knowledgeable	3	5	Yes	Yes	Strongly agree	Strongly agree	Strongly Agree	Strongly Agree	Strongly Agree	Strongly Agree	Strongly Agree	Strongly Agree	Strongly Agree	Extremely worthwhile	Extremely worthwhile	Extremely worthwhile	Somewhat worthwhile	Somewhat worthwhile	Strongly Agree	Strongly Agree
058	F	Y	Y	2	3	3	5	3	2	1	2	3	2	1	3	4	5	6	4	4	3	4	3	5	5	4	5	Slightly knowledgeable	Moderately knowledgeable	5	6	Yes	Yes	Somewhat agree	Somewhat agree	Strongly Agree	Strongly Agree	Strongly Agree	Agree	Agree	Strongly Agree	Strongly Agree	Somewhat worthwhile	Somewhat worthwhile	Somewhat worthwhile	Somewhat worthwhile	Somewhat worthwhile	Agree	Agree
059	F	Y	N	4	4	3	2	2	3	3	4	4	3	3	5	5	5	5	5	5	4	5	5	5	4	5	5	Moderately knowledgeable	Very knowledgeable	4	5	Yes	Yes	Somewhat agree	Somewhat agree	Agree	Agree	Agree	Neutral	Neutral	Neutral	Neutral	Somewhat worthwhile	A little worthwhile	Quite worthwhile	Quite worthwhile	Quite worthwhile	Agree	Agree
060	F	Y	N	3	3	3	4	3	3	4	3	4	4	4	4	5	5	4	5	5	4	4	5	5	5	5	5	Moderately knowledgeable	Moderately knowledgeable	3	4	Yes	Maybe	Somewhat agree	Strongly agree	Strongly Agree	Strongly Agree	Strongly Agree	Strongly Agree	Strongly Agree	Strongly Agree	Strongly Agree	Somewhat worthwhile	Quite worthwhile	Quite worthwhile	Somewhat worthwhile	Somewhat worthwhile	Agree	Agree
061	F	Y	N	4	4	3	3	3	4	3	5	3	3	2	3	4	3	3	4	3	3	3	5	5	4	4	4	Very knowledgeable	Moderately knowledgeable	4	5	Yes	Yes	Somewhat agree	Somewhat agree	Strongly Agree	Agree	Strongly Agree	Agree	Agree	Agree	Agree	Somewhat worthwhile	Quite worthwhile	Extremely worthwhile	Quite worthwhile	Quite worthwhile	Agree	Neutral
062	F	Y	N	4	4	3	4	3	4	3	3	3	4	4	6	5	5	5	5	4	5	4	5	4	4	4	5	Very knowledgeable	Moderately knowledgeable	3	4	Yes	Yes	Somewhat disagree	Somewhat agree	Agree	Strongly Agree	Strongly Agree	Strongly Agree	Agree	Agree	Agree	Somewhat worthwhile	A little worthwhile	Extremely worthwhile	A little worthwhile	A little worthwhile	Agree	Agree
063	M	Y	N	3	4	3	2	3	2	1	0	4	4	2	5	5	4	3	3	5	3	2	5	6	4	5	5	Moderately knowledgeable	Moderately knowledgeable	4	2	Yes	Yes	Strongly agree	Strongly agree	Strongly Agree	Strongly Agree	Strongly Agree	Strongly Agree	Strongly Agree	Strongly Agree	Strongly Agree	Extremely worthwhile	Extremely worthwhile	Extremely worthwhile	Extremely worthwhile	Somewhat worthwhile	Agree	Agree
064	F	Y	N	6	5	6	6	6	6	6	6	6	6	6	6	6	6	6	4	6	5	6	6	6	4	4	6	Slightly knowledgeable	Not knowledgeable at all	6	6	Yes	Yes	Strongly agree	Strongly agree	Strongly Agree	Strongly Agree	Strongly Agree	Strongly Agree	Strongly Agree	Strongly Agree	Strongly Agree	Extremely worthwhile	Extremely worthwhile	Extremely worthwhile	Extremely worthwhile	Extremely worthwhile	Strongly Agree	Strongly Agree
065	F	Y	N	3	3	2	3	4	3	3	4	2	2	2	4	4	4	4	6	4	4	4	5	5	4	4	5	Slightly knowledgeable	Very knowledgeable	3	6	Yes	Yes	Somewhat agree	Strongly agree	Strongly Agree	Strongly Agree	Strongly Agree	Agree	Agree	Strongly Agree	Strongly Agree	Extremely worthwhile	Extremely worthwhile	Extremely worthwhile	Quite worthwhile	Quite worthwhile	Neutral	Neutral
066	F	Y	N	1	2	1	0	1	1	0	2	3	2	3	3	4	5	5	5	5	5	4	5	5	5	5	4	Moderately knowledgeable	Very knowledgeable	5	6	Yes	Yes	Somewhat agree	Strongly agree	Strongly Agree	Strongly Agree	Strongly Agree	Strongly Agree	Strongly Agree	Strongly Agree	Strongly Agree	Extremely worthwhile	Extremely worthwhile	Extremely worthwhile	Extremely worthwhile	Extremely worthwhile	Strongly Agree	Strongly Agree
067	F	Y	Y	6	5	5	2	3	3		4	5	5	4	3	6	6	6	6	5	6	6	6	5	6	6	6	Moderately knowledgeable	Moderately knowledgeable	6	6	Yes	Maybe	Somewhat agree	Somewhat agree	Strongly Agree	Strongly Agree	Strongly Agree	Strongly Agree	Strongly Agree	Strongly Agree	Strongly Agree	Quite worthwhile	Quite worthwhile	Extremely worthwhile	Quite worthwhile	Quite worthwhile	Agree	Strongly Agree
068	F	Y	N	4	4	4	3	4	4	2	5	5	5	5	4	3	4	5	6	4	5	4	5	6	5	5	5	Very knowledgeable	Very knowledgeable	5	6	Yes	Yes	Strongly agree	Strongly agree	Strongly Agree	Strongly Agree	Strongly Agree	Agree	Strongly Agree	Strongly Agree	Strongly Agree	Somewhat worthwhile	Somewhat worthwhile	A little worthwhile	Quite worthwhile	Extremely worthwhile	Neutral	Disagree
069	F	N		2	4	2	3	3	4	4	4	4	5	5	4	4	5	5	5	5	4	5	5	5	5	5	5	Slightly knowledgeable	Very knowledgeable	3	5	Yes	Yes	Somewhat agree	Strongly agree	Agree	Agree	Agree	Agree	Agree	Agree	Agree	Extremely worthwhile	Extremely worthwhile	Extremely worthwhile	Extremely worthwhile	Extremely worthwhile	Strongly Agree	Agree
070	F	Y	N	4	4	3	4	3	2	2	4	5	4	4	5	5	6	5	4	5	5	5	4	5	5	4	5	Moderately knowledgeable	Very knowledgeable	1	5	Yes	Yes	Somewhat agree	Strongly agree	Strongly Agree	Strongly Agree	Strongly Agree	Agree	Strongly Agree	Strongly Agree	Strongly Agree	Extremely worthwhile	Extremely worthwhile	Extremely worthwhile	Quite worthwhile	Extremely worthwhile	Neutral	Strongly Agree
071	F	Y	N	4	5	5	5	5	4	3	2	3	3	3	3	5	5	5	5	4	5	4	6	5	5	5	5	Moderately knowledgeable	Very knowledgeable	2	5	Yes	No	Somewhat agree	Somewhat agree	Strongly Agree	Strongly Agree	Strongly Agree	Agree	Strongly Agree	Strongly Agree	Strongly Agree	Somewhat worthwhile	Extremely worthwhile	Extremely worthwhile	Somewhat worthwhile	Somewhat worthwhile	Strongly Agree	Strongly Agree
072	F	Y	N	5	5	5	5	5	5	4	6	5	6	6	5	5	6	5	6	6	6	4	6	6	6	6	6	Moderately knowledgeable	Extremely knowledgeable	6	6	Yes	Yes	Strongly agree	Strongly agree	Strongly Agree	Strongly Agree	Strongly Agree	Strongly Agree	Strongly Agree	Strongly Agree	Strongly Agree	Quite worthwhile	Somewhat worthwhile	Extremely worthwhile	Somewhat worthwhile	Extremely worthwhile	Neutral	Neutral
073	M	Y	N	3	3	2	4	3	2	2	3	2	3	3	2	5	6	5	5	5	5	5	5	6	6	5	4	Moderately knowledgeable	Very knowledgeable	3	4	Yes	Yes	Strongly agree	Strongly agree	Strongly Agree	Strongly Agree	Strongly Agree	Strongly Agree	Strongly Agree	Strongly Agree	Agree	A little worthwhile	Quite worthwhile	Quite worthwhile	Somewhat worthwhile	Somewhat worthwhile	Agree	Agree
074	F	Y	N	4	6	5	4	4	4	3	5	4	5	4	5	4	5	4	4	3	3	3	5	5	5	5	6	Very knowledgeable	Extremely knowledgeable	4	5	Yes	Yes	Somewhat agree	Somewhat agree	Strongly Agree	Strongly Agree	Strongly Agree	Strongly Agree	Strongly Agree	Strongly Agree	Strongly Agree	Quite worthwhile	Quite worthwhile	A little worthwhile	Quite worthwhile	Quite worthwhile	Strongly Disagree	Strongly Disagree
075	M	Y	Y	3	4	3	3	2	2	3	4	4	6	5	3	5	5	5	4	3	5	3	6	6	6	6	5	Moderately knowledgeable	Very knowledgeable	4	4	Yes	Yes	Somewhat agree	Strongly agree	Strongly Agree	Strongly Agree	Strongly Agree	Agree	Strongly Agree	Strongly Agree	Strongly Agree	Quite worthwhile	Quite worthwhile	Extremely worthwhile	Somewhat worthwhile	Quite worthwhile	Agree	Agree
076	F	Y	N	3	4	3	2	3	4	2	2	3	3	3	2	3	4	3	4	4	4	5	4	5	4	5	5	Moderately knowledgeable	Moderately knowledgeable	3	5	Yes	Yes	Strongly agree	Strongly agree	Agree	Agree	Agree	Agree	Agree	Agree	Agree	Quite worthwhile	Quite worthwhile	Extremely worthwhile	Extremely worthwhile	Extremely worthwhile	Agree	Agree
077	M	Y	N	2	2	3	2	2	3	4	3	2	3	2	3	4	5	4	3	4	4	4	5	6	6	6	5	Slightly knowledgeable	Very knowledgeable	4	4	Yes	Yes	Somewhat agree	Strongly agree	Strongly Agree	Strongly Agree	Strongly Agree	Strongly Agree	Strongly Agree	Strongly Agree	Strongly Agree	Extremely worthwhile	Extremely worthwhile	Extremely worthwhile	Quite worthwhile	Quite worthwhile	Agree	Neutral
078	M	Y	N	4	4	2	2	3	3	3	6	6	6	6	2	5	5	4	5	3	5	5	6	6	5	5	6	Moderately knowledgeable	Very knowledgeable	4	5	Yes	Yes	Strongly agree	Strongly agree	Strongly Agree	Strongly Agree	Strongly Agree	Strongly Agree	Strongly Agree	Strongly Agree	Strongly Agree	Extremely worthwhile	Extremely worthwhile	Extremely worthwhile	Extremely worthwhile	Extremely worthwhile	Strongly Agree	Strongly Agree
079	M	Y	N	3	3	3	2	1	2	1	3	4	5	3	3	4	5	5	6	5	5	5	5	6	6	6	6	Moderately knowledgeable	Very knowledgeable	4	5	Yes	Yes	Somewhat agree	Strongly agree	Strongly Agree	Strongly Agree	Strongly Agree	Agree	Strongly Agree	Strongly Agree	Strongly Agree	Quite worthwhile	Quite worthwhile	Somewhat worthwhile	Extremely worthwhile	Extremely worthwhile	Agree	Agree
080	F	N		2	2	3	2	2	2	1	3	2	4	4	2	4	5	5	5	4	5	5	6	6	5	6	5	Slightly knowledgeable	Moderately knowledgeable	2	5	Yes	Yes	Strongly agree	Strongly agree	Strongly Agree	Strongly Agree	Strongly Agree	Strongly Agree	Strongly Agree	Strongly Agree	Strongly Agree	Extremely worthwhile	Extremely worthwhile	Extremely worthwhile	Extremely worthwhile	Quite worthwhile	Strongly Agree	Strongly Agree
081	M	Y	N	3	3	3	3	3	3	3	5	5	5	5	2	5	5	5	5	5	5	5	5	5	5	5	5	Slightly knowledgeable	Very knowledgeable	5	5	Yes	No	Somewhat agree	Somewhat agree	Agree	Agree	Agree	Agree	Agree	Agree	Agree	Somewhat worthwhile	Somewhat worthwhile	Quite worthwhile	Somewhat worthwhile	Somewhat worthwhile	Agree	Agree
082	F	Y	N	0	0	0	0	2	3	0	3	3	4	4	4	3	3	4	3	3	3	3	6	6	6	4	5	Slightly knowledgeable	Moderately knowledgeable	5	5	Yes	Yes	Strongly agree	Strongly agree	Strongly Agree	Strongly Agree	Strongly Agree	Strongly Agree	Strongly Agree	Strongly Agree	Strongly Agree	Extremely worthwhile	Extremely worthwhile	Extremely worthwhile	Extremely worthwhile	Extremely worthwhile	Strongly Agree	Strongly Agree
083	M	Y	N	5	5	5	4	5	4	4	3	3	5	5	3	4	5	5	4	5	5	5	3	3	4	4	4	Moderately knowledgeable	Very knowledgeable	5	5	Yes	Yes	Neither agree nor disagree	Neither agree nor disagree	Agree	Agree	Agree	Neutral	Agree	Neutral	Agree	Somewhat worthwhile	Quite worthwhile	Extremely worthwhile	Somewhat worthwhile	Somewhat worthwhile	Neutral	Neutral
084	F	Y	N	3	3	3	3	4	3	4	4	4	4	3	3	4	4	5	5	5	5	4	5	5	5	5	4	Moderately knowledgeable	Moderately knowledgeable	4	6	Yes	Yes	Somewhat agree	Somewhat agree	Strongly Agree	Strongly Agree	Strongly Agree	Strongly Agree	Strongly Agree	Strongly Agree	Agree	Extremely worthwhile	Extremely worthwhile	Extremely worthwhile	Quite worthwhile	Extremely worthwhile	Agree	Neutral
085	M	Y	N	3	4	3	2	3	2	2	1	1	4	4	3	5	5	5	5	4	3	2	3	4	5	5	3	Slightly knowledgeable	Very knowledgeable	2	3	Maybe	Maybe	Somewhat agree	Somewhat agree	Agree	Agree	Strongly Agree	Agree	Agree	Agree	Neutral	Somewhat worthwhile	Somewhat worthwhile	Somewhat worthwhile	Somewhat worthwhile	Somewhat worthwhile	Neutral	Neutral
086	F	Y	N	4	4	4	4	4	4	3	3	4	4	4	4	4	5	4	4	4	4	4	4	5	4	4	5	Moderately knowledgeable	Very knowledgeable	3	4	Yes	Maybe	Strongly agree	Somewhat agree	Agree	Agree	Agree	Agree	Agree	Agree	Neutral	Extremely worthwhile	Extremely worthwhile	Extremely worthwhile	Extremely worthwhile	Extremely worthwhile	Agree	Strongly Agree
087	F	Y	N	5	4	2	1	3	4	4	6	1	1	3	5	5	5	5	5	5	5	5	6	3	4	4	5	Moderately knowledgeable	Moderately knowledgeable	6	6	Yes	Maybe	Strongly agree	Strongly agree	Strongly Agree	Strongly Agree	Strongly Agree	Strongly Agree	Strongly Agree	Strongly Agree	Strongly Agree	Somewhat worthwhile	Quite worthwhile	Extremely worthwhile	Extremely worthwhile	Extremely worthwhile	Strongly Agree	Strongly Agree
088	F	Y	N	2	3	3	2	3	4	4	5	5	3	3	3	3	4	4	2	3	3	4	5	6	6	6	4	Slightly knowledgeable	Very knowledgeable	3	4	Yes	Yes	Neither agree nor disagree	Neither agree nor disagree	Agree	Agree	Agree	Agree	Agree	Agree	Agree	Quite worthwhile	Quite worthwhile	Extremely worthwhile	Not worthwhile at all	Somewhat worthwhile	Neutral	Disagree
089	M	Y	N	5	5	5	3	5	4	3	5	5	5	3	5	6	6	6	6	6	6	6	6	6	6	6	6	Moderately knowledgeable	Very knowledgeable	5	6	Yes	Yes	Strongly agree	Strongly agree	Strongly Agree	Strongly Agree	Strongly Agree	Strongly Agree	Strongly Agree	Strongly Agree	Strongly Agree	Extremely worthwhile	Extremely worthwhile	Extremely worthwhile	Quite worthwhile	Extremely worthwhile	Strongly Agree	Strongly Agree
090	F	Y	Y	2	5	4	3	2	3	4	3	4	5	3	6	5	5	4	2	4	5	4	5	5	5	4	5	Moderately knowledgeable	Very knowledgeable	5	6	Yes	Yes	Somewhat agree	Somewhat agree	Agree	Neutral	Agree	Agree	Agree	Agree	Agree	Extremely worthwhile	Extremely worthwhile	Extremely worthwhile	Somewhat worthwhile	Somewhat worthwhile	Strongly Agree	Strongly Agree
091	M	Y	N	3	3	3	2	3	3	3	4	3	4	3	4	5	5	5	5	5	4	4	4	5	5	5	4	Moderately knowledgeable	Very knowledgeable	5	5	Yes	Maybe	Somewhat agree	Strongly agree	Agree	Agree	Strongly Agree	Strongly Agree	Agree	Agree	Agree	Quite worthwhile	Quite worthwhile	Extremely worthwhile	Somewhat worthwhile	Quite worthwhile	Agree	Agree
092	F	Y	Y	2	2	3	2	2	2	2	6	4	4	3	1	4	5	5	4	5	5	5	6	6	6	6	5	Slightly knowledgeable	Very knowledgeable	3	6	Yes	Yes		Strongly agree	Strongly Agree	Strongly Agree	Strongly Agree	Strongly Agree	Strongly Agree	Strongly Agree	Strongly Agree	Quite worthwhile	Quite worthwhile	Quite worthwhile	Somewhat worthwhile	A little worthwhile	Strongly Disagree	Strongly Disagree
093	M	Y	N	4	3	4	4	4	5	5	6	5	4	4	5	5	4	6	5	4	5	5	6	5	6	5	6	Moderately knowledgeable	Moderately knowledgeable	5	6	Yes	Yes	Somewhat agree	Strongly agree	Strongly Agree	Strongly Agree	Strongly Agree	Strongly Agree	Strongly Agree	Strongly Agree	Strongly Agree	Extremely worthwhile	Extremely worthwhile	Extremely worthwhile	Extremely worthwhile	Extremely worthwhile	Agree	Neutral
094	F	Y	N	4	3	3	3	3	4	3	4	3	4	3	2	4	4	4	4	4	5	4	5	5	5	5	4	Slightly knowledgeable	Moderately knowledgeable	2	4	Yes	Yes	Somewhat agree	Strongly agree	Agree	Agree	Agree	Agree	Agree	Agree	Agree	Extremely worthwhile	Extremely worthwhile	Extremely worthwhile	Somewhat worthwhile	Somewhat worthwhile	Agree	Agree
095	F	Y	N	3	4	4	2	3	2	1	5	5	4	3	5	3	5	4	3	3	4	4	6	6	5	5	5	Moderately knowledgeable	Moderately knowledgeable	5	5	Yes	Yes	Strongly agree	Strongly agree	Strongly Agree	Strongly Agree	Strongly Agree	Strongly Disagree	Neutral	Agree	Neutral	Quite worthwhile	Quite worthwhile	Extremely worthwhile	Somewhat worthwhile	Quite worthwhile	Strongly Agree	Strongly Agree
096	F	Y	N	4	3	5	5	3	4	2	3	3	3	5	4	6	6	5	3	5	2	2	5	5	5	5	5	Slightly knowledgeable	Slightly knowledgeable	6	6	Yes	Yes	Strongly agree	Strongly agree	Strongly Agree	Strongly Agree	Strongly Agree	Strongly Agree	Strongly Agree	Strongly Agree	Strongly Agree	A little worthwhile	Somewhat worthwhile	Extremely worthwhile	Quite worthwhile	Quite worthwhile	Strongly Agree	Strongly Agree
097	M	Y	Y	5	5	4	4	3	4	3	6	5	5	4	5	5	6	6	6	6	6	5	6	5	6	6	6	Moderately knowledgeable	Very knowledgeable	4	6	Yes	Yes	Strongly agree	Strongly agree	Strongly Agree	Strongly Agree	Strongly Agree	Strongly Agree	Strongly Agree	Strongly Agree	Strongly Agree	Quite worthwhile	Quite worthwhile	Extremely worthwhile	Extremely worthwhile	Quite worthwhile	Strongly Agree	Strongly Agree
098	M	Y	Y	4	6	5	4	4	4	4	5	5	5	5	4	5	5	5	4	4	5	5	6	6	6	6	6	Moderately knowledgeable	Very knowledgeable	4	6	Yes	Yes	Somewhat agree	Strongly agree	Strongly Agree	Strongly Agree	Strongly Agree	Strongly Agree	Strongly Agree	Strongly Agree	Strongly Agree	Quite worthwhile	Quite worthwhile	Quite worthwhile	Quite worthwhile	Quite worthwhile	Agree	Agree
099	M	Y	N	5	4	3	5	3	2	2	5	4	5	5	4	5	6	5	6	5	5	6	5	6	6	6	5	Extremely knowledgeable	Extremely knowledgeable	5	6	Yes	Yes	Strongly agree	Strongly agree	Strongly Agree	Strongly Agree	Strongly Agree	Strongly Agree	Strongly Agree	Strongly Agree	Strongly Agree	Extremely worthwhile	Extremely worthwhile	Extremely worthwhile	Quite worthwhile	Quite worthwhile	Agree	Agree
100	M	Y	Y	4	2	2	0	4	4	1	6	6	3	1	6	5	3	3	5	4	6	6	6	6	4	4	6	Very knowledgeable	Very knowledgeable	6	6	Yes	Maybe	Somewhat disagree	Strongly disagree	Strongly Agree	Strongly Agree	Strongly Agree	Strongly Agree	Strongly Agree	Strongly Agree	Strongly Agree	Somewhat worthwhile	Somewhat worthwhile	Extremely worthwhile	Not worthwhile at all	Not worthwhile at all	Strongly Disagree	Disagree
101	F	Y	Y	4	3	3	2	4	4	3	3	5	3	3	5	4	5	5	5	5	4	5	5	5	6	6	5	Moderately knowledgeable	Very knowledgeable	4	6	Yes	Yes	Strongly agree	Strongly agree	Strongly Agree	Strongly Agree	Strongly Agree	Agree	Strongly Agree	Strongly Agree	Strongly Agree	Quite worthwhile	Extremely worthwhile	Extremely worthwhile	Quite worthwhile	Extremely worthwhile	Agree	Strongly Agree
102	M	Y	Y	4	6	5	4	3	3	3	6	5	6	5	5	6	6	6	6	6	6	6	6	6	6	6	6	Moderately knowledgeable	Moderately knowledgeable	3	4	Yes	Yes	Strongly agree	Strongly agree	Strongly Agree	Strongly Agree	Strongly Agree	Strongly Agree	Strongly Agree	Strongly Agree	Strongly Agree	Extremely worthwhile	Extremely worthwhile	Extremely worthwhile	Extremely worthwhile	Extremely worthwhile	Strongly Agree	Strongly Agree
103	M	Y	Y	3	5	4	6	5	3	3	6	3	5	2	6	5	5	3	3	5	5	4	6	6	6	5	6	Very knowledgeable	Moderately knowledgeable	4	6	Yes	Yes	Strongly agree	Strongly agree	Strongly Agree	Strongly Agree	Strongly Agree	Strongly Agree	Strongly Agree	Strongly Agree	Strongly Agree	Extremely worthwhile	Extremely worthwhile	Quite worthwhile	Extremely worthwhile	Quite worthwhile	Strongly Agree	Strongly Agree
104	F	Y	N	3	4	3	3	3	2	2	3	4	5	5	4	4	5	4	5	4	3	3	6	5	6	6	5	Slightly knowledgeable	Very knowledgeable	2	4	Yes	Yes	Strongly agree	Strongly agree	Strongly Agree	Strongly Agree	Strongly Agree	Strongly Agree	Strongly Agree	Strongly Agree	Strongly Agree	Extremely worthwhile	Extremely worthwhile	Extremely worthwhile	Quite worthwhile	Quite worthwhile	Agree	Strongly Agree
105	M	Y	Y	5	5	3	2	2	2	3	5	5	5	6	2	6	5	5	5	6	5	4	6	6	6	6	5	Moderately knowledgeable	Very knowledgeable	4	6	Yes	Yes	Somewhat agree	Somewhat agree	Strongly Agree	Strongly Agree	Strongly Agree	Strongly Agree	Strongly Agree	Strongly Agree	Strongly Agree	Quite worthwhile	Quite worthwhile	Extremely worthwhile	Quite worthwhile	Quite worthwhile	Strongly Agree	Strongly Agree
106	F	Y	N	3	4	3	4	4	4	3	5	5	5	5	4	4	5	4	4	4	5	5	5	6	5	5	5	Moderately knowledgeable	Moderately knowledgeable	2	3	Yes	Maybe	Somewhat agree	Strongly agree	Strongly Agree	Strongly Agree	Strongly Agree	Strongly Agree	Strongly Agree	Strongly Agree	Strongly Agree	Quite worthwhile	Somewhat worthwhile	Extremely worthwhile	Extremely worthwhile	Extremely worthwhile	Neutral	Neutral
107	F	Y	N	4	3	4	2	3	4	4	2	3	4	4	4	4	5	4	4	5	5	4	5	5	4	4	5	Moderately knowledgeable	Very knowledgeable	2	3	Maybe	Maybe	Somewhat agree	Strongly agree	Strongly Agree	Agree	Strongly Agree	Strongly Agree	Strongly Agree	Strongly Agree	Agree	Somewhat worthwhile	Quite worthwhile	Extremely worthwhile	Somewhat worthwhile	Quite worthwhile	Agree	Agree
108	F	N		3	5	4	5	4	5	5	5	4	4	4	4	4	5	4	4	5	4	4	4	5	5	4	4	Moderately knowledgeable	Very knowledgeable	4	6	Yes	Yes	Strongly agree	Strongly agree	Strongly Agree	Strongly Agree	Strongly Agree	Strongly Agree	Strongly Agree	Strongly Agree	Strongly Agree	Quite worthwhile	Quite worthwhile	Extremely worthwhile	Extremely worthwhile	Quite worthwhile	Agree	Strongly Agree
109	M	Y	N	4	5	4	5	5	5	5	4	5	5	5	4	4	4	5	5	4	4	6	5	5	6	6	5	Slightly knowledgeable	Moderately knowledgeable	3	4	Yes	Yes	Somewhat agree	Somewhat disagree	Strongly Agree	Strongly Agree	Strongly Agree	Strongly Agree	Strongly Agree	Strongly Agree	Strongly Agree	Extremely worthwhile	Extremely worthwhile	Extremely worthwhile	A little worthwhile	Quite worthwhile	Neutral	Agree
110	M	Y	N	5	5	5	3	3	3	3	4	4	3	3	5	4	5	5	4	5	5	5	5	4	6	4	6	Moderately knowledgeable	Very knowledgeable	3	5	Yes	Yes	Strongly agree	Strongly agree	Strongly Agree	Strongly Agree	Strongly Agree	Strongly Agree	Strongly Agree	Strongly Agree	Strongly Agree	Extremely worthwhile	Extremely worthwhile	Somewhat worthwhile	Extremely worthwhile	Extremely worthwhile	Agree	Agree
111	F	Y	Y	1	1	1	0	0	0	0	2	3	4	1	1	4	5	4	4	4	4	4	5	5	5	5	4	Moderately knowledgeable	Moderately knowledgeable	4	6	Yes	Yes	Strongly agree	Strongly agree	Strongly Agree	Strongly Agree	Strongly Agree	Strongly Agree	Strongly Agree	Strongly Agree	Strongly Agree	Extremely worthwhile	Extremely worthwhile	Extremely worthwhile	Extremely worthwhile		Strongly Agree	Strongly Agree
112	F	Y	N	2	2	2	2	2	2	2	3	3	3	3	5	4	4	4	4	4	4	4	6	4	4	4	4	Very knowledgeable	Very knowledgeable	3	2	Yes	Yes	Somewhat agree	Strongly agree	Strongly Agree	Strongly Agree	Strongly Agree	Strongly Agree	Strongly Agree	Strongly Agree	Strongly Agree	Quite worthwhile	Quite worthwhile	Extremely worthwhile	Quite worthwhile	Extremely worthwhile	Agree	Agree
113	F	Y	Y	6	6	6	5	4	4	4	6	6	6	6	4	5	5	5	6	5	4	6	6	6	6	6	6	Slightly knowledgeable	Moderately knowledgeable	5	6	Yes	Yes	Somewhat agree	Strongly agree	Strongly Agree	Strongly Agree	Strongly Agree	Strongly Agree	Strongly Agree	Strongly Agree	Strongly Agree	Quite worthwhile	Quite worthwhile	Extremely worthwhile	Quite worthwhile	Quite worthwhile	Strongly Agree	Strongly Agree
114	M	N		4	3	4	4	4	3	4	5	5	5	4	4	5	6	6	6	5	6	5	6	6	6	6	6	Very knowledgeable	Very knowledgeable	5	6	Yes	Yes	Strongly agree	Strongly agree	Strongly Agree	Strongly Agree	Strongly Agree	Strongly Agree	Strongly Agree	Strongly Agree	Strongly Agree	Extremely worthwhile	Extremely worthwhile	Extremely worthwhile	Extremely worthwhile	Extremely worthwhile	Strongly Agree	Strongly Agree
115	M	Y	N	5	5	6	5	5	5	5	6	6	6	6	6	6	6	6	6	6	6	6	5	5	6	6	6	Very knowledgeable	Very knowledgeable	4	5	Yes	Yes	Strongly agree	Strongly agree	Strongly Agree	Strongly Agree	Strongly Agree	Strongly Agree	Strongly Agree	Strongly Agree	Strongly Agree	Quite worthwhile	Quite worthwhile	Extremely worthwhile	Extremely worthwhile	Extremely worthwhile	Strongly Agree	Agree
116	M	Y	N	4	3	3	3	3	3	2	6	5	4	3	5	4	5	4	3	4	4	4	5	5	5	4	4	Slightly knowledgeable	Very knowledgeable	3	3	Maybe	Yes	Somewhat disagree	Neither agree nor disagree	Strongly Agree	Strongly Agree	Strongly Agree	Strongly Agree	Strongly Agree	Strongly Agree	Strongly Agree	Quite worthwhile	Quite worthwhile	A little worthwhile	Quite worthwhile	Extremely worthwhile	Strongly Disagree	Strongly Disagree
117	M	Y	N	4	5	4	5	4	4	4	6	6	5	5	5	6	6	5	5	4	4	4	5	6	6	5	5	Slightly knowledgeable	Moderately knowledgeable	4	4	Yes	Yes	Somewhat agree	Strongly agree	Strongly Agree	Strongly Agree	Strongly Agree	Agree	Agree	Agree	Agree	Quite worthwhile	Quite worthwhile	Somewhat worthwhile	A little worthwhile	A little worthwhile	Agree	Agree
118	M	Y	N	4	2	3	4	2	3	3	4	2	5	4	3	5	5	5	5	6	6	5	6	6	6	5	5	Moderately knowledgeable	Very knowledgeable	6	6	Yes	Yes	Somewhat agree	Strongly agree	Strongly Agree	Strongly Agree	Strongly Agree	Strongly Agree	Strongly Agree	Strongly Agree	Agree	Quite worthwhile	Quite worthwhile	Extremely worthwhile	Somewhat worthwhile	Quite worthwhile	Strongly Agree	Strongly Agree
119	F	Y	N	1	2	2	0	0	1	1	2	2	2	2	2	2	4	2	4	4	4	3	5	4	4	4	4	Slightly knowledgeable	Moderately knowledgeable	4	5	Yes	Yes	Somewhat agree	Somewhat agree	Strongly Agree	Strongly Agree	Strongly Agree	Agree	Agree	Agree	Agree	Quite worthwhile	A little worthwhile	Somewhat worthwhile	Not worthwhile at all	Somewhat worthwhile	Neutral	Neutral
120	M	Y	Y	5	4	5	6	3	2	3	4	4	6	4	5	6	5	5	4	5	3	2	5	5	6	6	5	Moderately knowledgeable	Very knowledgeable	3	5	Yes	Yes	Somewhat agree	Somewhat agree	Strongly Agree	Strongly Agree	Strongly Agree	Strongly Agree	Agree	Agree	Agree	Extremely worthwhile	Extremely worthwhile	Quite worthwhile	Quite worthwhile	Quite worthwhile	Neutral	Neutral
121	F	Y	Y	4	4	3	2	2	1	1	3	3	3	3	4	3	4	4	3	4	4	4	5	4	4	4	5	Moderately knowledgeable	Very knowledgeable	5	6	Yes	Yes	Somewhat agree	Strongly agree	Strongly Agree	Neutral	Strongly Agree	Strongly Agree	Strongly Agree	Agree	Strongly Agree	Extremely worthwhile	Extremely worthwhile	A little worthwhile	Quite worthwhile	Quite worthwhile	Agree	Strongly Agree
122	F	N		6	5	5	2	4	2	1	5	6	5	5	6	4	6	5	5	5	5	5	6	6	6	6	5	Moderately knowledgeable	Moderately knowledgeable	6	6	Yes	Maybe	Somewhat agree	Strongly agree	Agree	Agree	Strongly Agree	Disagree	Agree	Strongly Agree	Neutral	Quite worthwhile	A little worthwhile	Extremely worthwhile	A little worthwhile	Extremely worthwhile	Agree	Neutral
123	F	Y	N	4	4	3	3	2	2	2	5	5	4	3	3	6	6	6	6	6	6	6	6	6	6	6	6	Moderately knowledgeable	Extremely knowledgeable	4	6	Yes	Yes	Strongly agree	Strongly agree	Strongly Agree	Strongly Agree	Strongly Agree	Strongly Agree	Strongly Agree	Strongly Agree	Strongly Agree	Extremely worthwhile	Extremely worthwhile	Extremely worthwhile	Extremely worthwhile	Extremely worthwhile	Strongly Agree	Strongly Agree
124	F	Y	N	3	2	2	2	2	2	2	2	3	3	3	2	4	4	5	4	4	4	4	5	5	5	5	4	Slightly knowledgeable	Very knowledgeable	4	5	Maybe	Yes	Somewhat agree	Somewhat agree	Strongly Agree	Strongly Agree	Strongly Agree	Strongly Agree	Strongly Agree	Strongly Agree	Strongly Agree	Quite worthwhile	Quite worthwhile	Quite worthwhile	Somewhat worthwhile	Somewhat worthwhile	Agree	Agree
125	F	N		3	3	3	3	2	2	3	2	2	3	2	3	4	5	4	5	4	4	4	6	4	4	4	5	Moderately knowledgeable	Moderately knowledgeable	4	6	Yes	Yes	Somewhat agree	Somewhat agree	Strongly Agree	Strongly Agree	Strongly Agree	Strongly Agree	Strongly Agree	Strongly Agree	Strongly Agree	Quite worthwhile	Quite worthwhile	Extremely worthwhile	Extremely worthwhile	Extremely worthwhile	Neutral	Neutral
126	M	Y	N	5	4	4	5	6	6	5	5	5	5	5	5	5	4	5	6	5	5	5	5	5	5	5	5	Very knowledgeable	Moderately knowledgeable	6	6	Yes	Yes	Somewhat agree	Somewhat agree	Strongly Agree	Strongly Agree	Strongly Agree	Neutral	Agree	Neutral	Agree	Quite worthwhile	Quite worthwhile	Extremely worthwhile	Quite worthwhile	Extremely worthwhile	Strongly Agree	Strongly Agree
127	M	Y	N	3	5	5	6	5	6	4	4	6	6	6	6	5	6	6	5	5	5	5	6	6	5	6	6	Moderately knowledgeable	Extremely knowledgeable	4	5	Yes	Yes	Strongly agree	Strongly agree	Strongly Agree	Strongly Agree	Strongly Agree	Strongly Agree	Strongly Agree	Strongly Agree	Strongly Agree	Quite worthwhile	Quite worthwhile	Quite worthwhile	A little worthwhile	Quite worthwhile	Strongly Agree	Strongly Agree
128	F	Y	Y	3			3	2	3	3	3	6	6	6	4	5	4	3	5	5	5	5	6	6	5	6	4	Slightly knowledgeable	Very knowledgeable	3	5	Yes	Yes	Strongly agree	Strongly agree	Strongly Agree	Strongly Agree	Strongly Agree	Strongly Agree	Strongly Agree	Strongly Agree	Strongly Agree	Extremely worthwhile	Extremely worthwhile	Extremely worthwhile	Extremely worthwhile	Extremely worthwhile	Strongly Agree	Strongly Agree
129	M	Y	Y	5	4	4	3	2	3	2	6	5	5	5	4	4	4	4	3	3	4	3	6	5	5	4	3	Very knowledgeable	Moderately knowledgeable	4	5	Yes	Yes	Strongly agree	Strongly agree	Strongly Agree	Strongly Agree	Strongly Agree	Strongly Agree	Strongly Agree	Strongly Agree	Strongly Agree	Quite worthwhile	Quite worthwhile	Extremely worthwhile	Quite worthwhile	Quite worthwhile	Strongly Agree	Strongly Agree
130	F	Y	N	3	3	2	1	1	1	1	2	1	2	2	3	4	5	4	3	3	3	2	3	4	4	4	4	Moderately knowledgeable	Moderately knowledgeable	4	5	Yes	Yes	Strongly agree	Strongly agree	Agree	Strongly Agree	Strongly Agree	Strongly Agree	Strongly Agree	Agree	Agree	Somewhat worthwhile	Extremely worthwhile	Extremely worthwhile	Quite worthwhile	Extremely worthwhile	Neutral	Agree
131	F	Y	N	3	6	5	2	5	5	5	6	6	6	6	6	6	6	6	5	5	5	4	6	6	6	6	6	Very knowledgeable	Extremely knowledgeable	5	6	Yes	Yes	Strongly agree	Strongly agree	Strongly Agree	Strongly Agree	Strongly Agree	Strongly Agree	Strongly Agree	Strongly Agree	Strongly Agree	Quite worthwhile	Extremely worthwhile	Extremely worthwhile	Quite worthwhile	Quite worthwhile	Strongly Agree	Strongly Agree
132	M	Y	N	5	5	5	5	4	5	5	5	4	6	5	5	5	6	5	4	5	6	3	6	6	5	6	6	Moderately knowledgeable	Very knowledgeable	5	6	Yes	Yes	Strongly agree	Strongly agree	Strongly Agree	Strongly Agree	Strongly Agree	Strongly Agree	Agree	Agree	Strongly Agree	Quite worthwhile	Quite worthwhile	Quite worthwhile	Somewhat worthwhile	Quite worthwhile	Strongly Agree	Strongly Agree
133	F	Y	N	3	3	1	1	0	0	0	3	1	3	3	3	3	3	3	3	2	2	2	4	4	3	2	3	Moderately knowledgeable	Very knowledgeable	6	6	Yes	No	Strongly agree	Strongly agree	Strongly Agree	Strongly Agree	Strongly Agree	Strongly Agree	Strongly Agree	Strongly Agree	Strongly Agree	Somewhat worthwhile	Quite worthwhile	Extremely worthwhile	Somewhat worthwhile	Extremely worthwhile	Agree	Neutral
134	M	Y	N	5	4	4	4	4	5	5	6	5	6	6	3	5	5	4	4	5	4	4			6	6	3	Moderately knowledgeable	Moderately knowledgeable	4	4	Yes	Yes	Somewhat agree	Strongly agree	Strongly Agree	Strongly Agree	Strongly Agree	Strongly Agree	Strongly Agree	Strongly Agree	Strongly Agree	Extremely worthwhile	Extremely worthwhile	Extremely worthwhile	Somewhat worthwhile	Quite worthwhile	Strongly Agree	Strongly Agree
135	M	N		4	5	4	4	4	3	3	5	4	4	3	4	4	5	4	4	4	3	4	6	6	4	4	5	Moderately knowledgeable	Moderately knowledgeable	4	5	Yes	Yes	Somewhat agree	Strongly agree	Strongly Agree	Strongly Agree	Strongly Agree	Strongly Agree	Strongly Agree	Strongly Agree	Strongly Agree	Extremely worthwhile	Extremely worthwhile	Quite worthwhile	Quite worthwhile	Quite worthwhile	Agree	Strongly Agree
136	F	Y	N	5	5	5	4	3	4	4	6	6	6	6	6	6	6	4	5	3	3	3	5	6	6	4	4	Moderately knowledgeable	Moderately knowledgeable	6	6	Yes	Yes	Strongly agree	Strongly agree	Strongly Agree	Strongly Agree	Strongly Agree	Agree	Strongly Agree	Strongly Agree	Strongly Agree	Extremely worthwhile	Extremely worthwhile	Somewhat worthwhile	Quite worthwhile	Extremely worthwhile	Agree	Agree
137	M	Y	N	6	6	5	4	4	4	4	6	6	5	5	5	5	5	5	6	5	5	6	6	6	6	6	6	Very knowledgeable	Very knowledgeable	5	6	Yes	Yes	Strongly agree	Strongly agree	Strongly Agree	Strongly Agree	Strongly Agree	Strongly Agree	Strongly Agree	Strongly Agree	Agree	Extremely worthwhile	Extremely worthwhile	Quite worthwhile			Agree	Agree
138	M	Y	N	3	2	3	5	6	5	5	3	3	5	4	4	5	5	5	5	5	5	5	4	5	5	4	4	Very knowledgeable	Moderately knowledgeable	4	4	Yes	Yes	Strongly agree	Strongly agree	Strongly Agree	Strongly Agree	Strongly Agree	Strongly Agree	Strongly Agree	Strongly Agree	Strongly Agree	Quite worthwhile	Quite worthwhile	Quite worthwhile	Somewhat worthwhile	Somewhat worthwhile	Strongly Agree	Strongly Agree
139	M	N		4	4	4	4	4	4	4	4	4	4	4	6	5	5	5	5	5	5	5	5	5	5	5	5	Moderately knowledgeable	Very knowledgeable	4	6	Yes	Yes	Somewhat agree	Somewhat agree	Agree	Agree	Agree	Agree	Agree	Agree	Agree	Extremely worthwhile	Extremely worthwhile	Extremely worthwhile	Extremely worthwhile	Extremely worthwhile	Strongly Agree	Strongly Agree
140	F	N		5	4	3	3	4	3	3	5	5	5	5	4	5	4	5	4	5	4	4	5	5	5	5	5	Very knowledgeable	Moderately knowledgeable	5	5	Yes	Yes	Somewhat agree	Somewhat agree	Agree	Agree	Agree	Neutral	Strongly Agree	Agree	Agree	Quite worthwhile	Quite worthwhile	Extremely worthwhile	Extremely worthwhile	Extremely worthwhile	Strongly Agree	Strongly Agree
141	F	Y	N	2	2	1	2	2	1	1	4	4	3	1	4	3	4	3	2	2	3	2	5	6	4	3	6	Moderately knowledgeable	Very knowledgeable	3	4	Yes	Yes	Somewhat agree	Strongly agree	Agree	Agree	Agree	Strongly Agree	Strongly Agree	Strongly Agree	Strongly Agree	Quite worthwhile	Quite worthwhile	A little worthwhile	Quite worthwhile	Somewhat worthwhile	Neutral	Neutral
142	M	N		4	5	5	3	4	3	3	6	6	6	6	6	5	5	5	6	5	5	5	6	6	6	6	6	Moderately knowledgeable	Very knowledgeable	6	6	Yes	Yes	Strongly agree	Strongly agree	Strongly Agree	Strongly Agree	Strongly Agree	Strongly Agree	Strongly Agree	Strongly Agree	Strongly Agree	Quite worthwhile	Quite worthwhile	Extremely worthwhile	Extremely worthwhile	Extremely worthwhile	Agree	Agree
																																												0.669014
[truncated: 3 more columns]
