# Supplementary material for: Rapid Adaptation and Remote Delivery of Undergraduate Research Training during the COVID-19 Pandemic
Source: MDPI journal article supplement (doi:10.3390/su13116133), 2021-05-29
Supplement: s1 [file s1 › Copy of Supplementary Material S3_wellness data-1.xlsx]

## Sheet: Wellness data
Student study ID	Wellness survey complete (0=no, 1=yes)	Program binary (0=non-participant or drop out, 1=participant, 2=control group)	(PRE) I tend to bounce back quickly after hard times.	(PRE) I have a hard time making it through stressful events.	(PRE) It does not take me long to recover from a stressful event.	(PRE) It is hard for me to snap back when something bad happens.	(PRE) I usually come through difficult times with little trouble.	(PRE) I tend to take a long time to get through set-backs in my life.	(PRE) In the last month, how often have you been upset because of something that happened unexpectedly?	(PRE) In the last month, how often have you felt that you were unable to control the important things in your life?	(PRE) In the last month, how often have you felt nervous and "stressed"?	(PRE) In the last month, how often have you felt confident about your ability to handle your personal problems?	(PRE) In the last month, how often have you felt that things were going your way?	(PRE) In the last month, how often have you found that you could not cope with all the things that you had to do?	(PRE) In the last month, how often have you been able to control irritations in your life?	(PRE) In the last month, how often have you felt that you were on top of things?	(PRE) In the last month, how often have you been angered because of things that were outside of your control?	(PRE) In the last month, how often have you felt difficulties were piling up so high that you could not overcome them?	(PRE) In most ways my life is close to my ideal.	(PRE) The conditions of my life are excellent.	(PRE) I am satisfied with my life.	(PRE) So far I have gotten the important things I want in life.	(PRE) If I could live my life over, I would change almost nothing.	(POST) I tend to bounce back quickly after hard times.	(POST) I have a hard time making it through stressful events.	(POST) It does not take me long to recover from a stressful event.	(POST) It is hard for me to snap back when something bad happens.	(POST) I usually come through difficult times with little trouble.	(POST) I tend to take a long time to get through set-backs in my life.	(POST) In the last month, how often have you been upset because of something that happened unexpectedly?	(POST) In the last month, how often have you felt that you were unable to control the important things in your life?	(POST) In the last month, how often have you felt nervous and "stressed"?	(POST) In the last month, how often have you felt confident about your ability to handle your personal problems?	(POST) In the last month, how often have you felt that things were going your way?	(POST) In the last month, how often have you found that you could not cope with all the things that you had to do?	(POST) In the last month, how often have you been able to control irritations in your life?	(POST) In the last month, how often have you felt that you were on top of things?	(POST) In the last month, how often have you been angered because of things that were outside of your control?	(POST) In the last month, how often have you felt difficulties were piling up so high that you could not overcome them?	(POST) In most ways my life is close to my ideal.	(POST) The conditions of my life are excellent.	(POST) I am satisfied with my life.	(POST) So far I have gotten the important things I want in life.	(POST) If I could live my life over, I would change almost nothing.
12	0	1
36	1	1	4	2	3	2	4	2	4	4	5	4	3	3	3	3	4	3	2	1	1	2	1	4	2	2	2	2	2	5	4	5	4	2	2	3	3	5	3	6	4	2	1	2
216	0	0
1510	1	1	5	2	4	2	4	1	3	1	3	4	4	2	4	4	3	2	4	2	2	3	1	5	1	5	1	4	2	3	2	3	5	4	3	4	5	2	2	2	1	1	2	1
41	1	1	3	4	2	4	2	3	4	5	5	2	2	3	2	2	4	4	5	5	3	4	5	2	3	4	4	2	2	3	3	3	3	4	3	2	2	4	3	5	4	3	3	5
157	1	0	2	4	2	5	2	4	5	5	5	3	2	4	2	3	2	4	5	4	3	2	4	3	2	3	3	3	2	3	3	4	3	3	4	4	4	3	1	5	2	2	2	5
184	0	1
166	1	1	4	3	4	2	3	2	2	4	3	4	2	2	3	4	4	3	2	1	2	2	5	4	2	3	3	3	4	4	4	4	4	4	4	4	4	4	2	2	2	2	1	5
185	1	1	3	2	3	3	4	3	3	3	3	4	3	3	3	4	4	3	3	4	3	5	6	4	3	3	2	3	3	3	2	3	4	3	2	3	3	3	2	3	3	3	4	6
56	2	0	4	2	4	2	4	2	2	4	2	3	3	2	4	5	3	3	2	1	1	1	3
1410	0	1
183	1	1	4	2	4	2	3	2	4	4	4	5	4	2	4	3	4	3	2	2	2	2	3	4	2	4	2	4	2	4	4	3	4	4	3	3	3	2	2	2	2	2	3	3
29	1	1	4	4	3	3	3	2	3	4	5	3	3	4	4	2	3	4	5	3	3	2	5	4	3	4	2	3	2	3	4	5	4	3	2	4	4	3	3	3	2	2	2	3
49	0	1
92	1	1	4	2	4	2	4	2	2	2	4	4	3	2	3	4	3	1	3	5	3	3	1	4	2	4	2	4	2	3	3	4	4	3	3		3	3	2	3	3	2	2	1
148	1	1	4	4	2	4	3	4	5	2	5	3		3	3	3	5	4	5	5	2	2	7	2	4	4	4	2	4	2	3	3	4	4	3	4	4	3	3	3	1	2	3	7
137	1	1	2	3	2	4	2	4	4	4	4	3	3	4	3	2	2	3	4	3	3	2	5	4	3	3	3	2	3	2	2	3	4	4	2	4	3	2	2	3	2	3	1	3
22	2	1	5	2	3	4	3	3	3	3	4	5	3	3	3	3	4	3	3	2	2	2	5
96	0	0
210	1	1	4	3	2	3	2	3	5	5	5	4	3	3	4	3	4	4	2	2	2	2	1	4	4	3	2	3	3	3	4	5	4	3	4	3	4	4	4	2	2	2	1	1
214	0	0
218	0	0
23	1	1	4	1	3	2	3	4	2	2	3	4	4	2	3	4	2	2	3	2	2	3	4	4	2	3	3	4	2	3	3	3	4	3	1	4	3	2	3	2	2	2	1	2
149	0	1
25	1	1	4	2	2	3	3	2	3	3	4	4	4	1	4	4	2	2	2	2	2	2	2	2	3	3	2	3	3	3	2	4	4	3	3	3	3	4	3	3	2	2	2	2
135	1	1	1	2	1	4	3	4	5	5	5	4	3	5	3	2	4	3	5	2	6	1	7	4	2	1	3	5	2	3	5	2	3	4	1	3	3	4	3	3	5	3	1	2
99	1	1	5	3	3	2	4	2	4	4	5	3	3	2	4	4	4	3	6	5	6	5	7	4	2	4	2	4	2	4	3	4	3	3	2	3	3	3	3	6	5	5	5	7
128	1	1	3	3	4	2	4	2	3	4	4	3	3	3	3	3	2	3	5	5	5	5	6	2	2	2	4	2	2	2	3	4	3	3	4	3	2	2	4	3	3	3	2	5
72	2	0	3	4	3	2	3	3	4	2	4	4	3	4	4	1		5	6	6	4	5	6
178	1	1	4	2	4	2	3	2	3	4	5	4	3	2	4	4	4	2	3	3	2	3	4	4	2	5	2	4	2	2	3	3	5	4	2	4	4	3	2	1	2	2	2	2
66	1	1	2	4	2	4	1	5	5	5	5	3	2	5	2	1	3	5	3	2	2	3	3	4	4	3	3	4	3	5	5	5	3	4	5	2	2	4	5	2	1	1	2	1
85	2	1	4	1	4	2	4	2	3	2	4	5	3	2	5	3	2	3	2	1	2	2	3
7	1	1	4	2	4	2	4	3	5	3	5	3	4	2	3	3	5	2	4	2	2	2	3	3	4	4	5	3	2	3	3	4	3	4	3	4	3	3	1	2	2	2	3	1
17	0	1
224	0	0
223	0	0
31	1	1	4	3	2	2	3	2	3	3	3	4	3	3	4	4	2	2	3	2		3	6	4	2	4	2	2	2	3	3	3	4	3	2	4	4	2	2	2	2	2	3	2
27	1	1	4	2	3	3	3	2	3	4	5	3	3	4	3	2	3	4	3	4	4	4	5	4	3	3	3	3	2	3	3	3	4	4	4	4	4	3	3	5	2	4	4	5
143	1	1	4	2	3	2	3	2	2	4	4	3	3	2	4	3	3	2	3	3	3	2	2	4	3	4	2	4	2	2	4	3	4	3	2	4	5	1	2	2	2	2	2	2
203	0	0
510	0	1
710	0	0
47	0	1
81	2	0	5	2	4	2	3	2	3	2	3	5	5	2	5	5	3	3	2	2	2	2	4
144	0	0
110	1	1	5	5	2	2	3	2	2	2	4	4	4	2	4	4	2	2	1	1	1	1	7	5	4	2	3	2	5	2	1	2	5	5	2	3	4	2	1	1	1	1	1	1
16	1	1	4	2	5	1	5	2	3	5	2	4	3	2	4	4	3	3	1	2	1	1	3	4	2	5	1	4	3	3	2	3	5	3	3	4	3	2	2	2	2	1	4	2
24	1	1	4	2	4	1	2	3	5	5	5	3	2	4	2	4	5	4	7	5	5	7	6	5	1	5	1	5	1	5	1	5	5	2	1	2	5	5	1	7	6	6	6	7
171	1	1	4	3	2	4	2	4	3	3	4	3	3	2	3	2	4	4	3	3	2	2	5	4	2	2	4	2	4	3	4	4	4	3	3	3	3	3	3	2	2	2	1	2
610	1	1	4	2	4	2	4	2	5	5	5	3	2	5	2	2	4	4	5	2	5	2	7	4	3	4	2	4	2	3	4	4	3	2	5	3	1	3	5	2	2	2	2	7
15	1	1	4	3	4	2	3	2	2	2	3	4	3	2	4	4	2	1	2	3	1	1	2	4	2	5	2	4	2	2	2	3	5	4	2	4	4	2	2	2	1	1	1	2
187	0	0
201	0	0
3	1	1	3	3	3	3	2	4	3	3	3	3	3	3	3		3	3	4	4	4	4	4	3	3	3	3	3	3	3	3	3	3	3	3	3	3	3	3	4	4	4	4	4
124	0	1
205	0	0
186	0	0
33	1	1	5	2	1	3	2	2	4	5	3	5	1	3	4	4	5	3	1	1	1	1	1	5	2	5	2	4	4	2	1	1	5	5	1	5	5	3	2	1	1	1	1	1
123	1	1	5	1	2	2	4	1	1	1	3	4	5	1	5	5	4	1	1	1	1	1	1	5	2	4	2	5	1	2	2	2	5	5	2	4	3	3	2	1	1	1	1	1
95	1	1	5	1	5	2	3	2	4	3	3	4	4	4	4	3	3	3	2	1	1	1	6	4	2	2	2	2	2	4	3	4	4	3	5	3	3	4	3	4	4	4	4	4
193	0	0
177	1	1	3	3	2	3	3	2	3	4	4	3	3	1		4	1	2	2	2	2	2	4	3	3	3	3	3	3	3	3	3	4	4	2	4	3	3	2	3	2	2	2	4
213	0	0
64	0	0
79	0	1
87	1	1	5	2	5	2	4	1	3	4	4	5	4	2	4	3	3	2	1	1	1	1	1	5	2	5	1	5	2	3	4	4	5	5	3	5	4	2	3	1	1	1	1	2
202	0	0
116	0	0
222	0	0
4	0	0
217	0	0
2010	0	0
1610	1	1	4	4	2	4	2	3	5		5	3	2	5	2	2	5	5	5	6	5	3	3	3	4	2	4	2	4	3	3	5	4	4	4	3	2	4	4	3	5	3	2	3
82	1	1	4	4	3	3	2	3	5	5	5	3	2	5	3	3	4	5	2	2	2	1	3	3	4	3	3	2	3	4	4	4	4	3	4	3	4	3	4	1	2	1	1	2
28	1	1	4	3	4	2	2	2	4	3	5	3	3	4	3	4	3	4	3	5	4	3	3	4	2	4	2	3	2	3	4	4	3	3	3	3	4	3	3	3	4	3	3	1
2110	0	0
1321	1	1	4	4	4	3	2	2	3	5	4	3	2	2	3	4	4	3	6	4	3	2	1	4	3	3	2	2	2	3	4	3	3	3	2	4	4	4	3	6	6	6	2	3
59	0	1
195	0	0
179	1	1	4	2	4	2	3	2	3	5	5	5	3	2	4	4	5	1	3	2	2	2	2	4	2	2	3	2	3	3	5	5	5	3	2	4	3	4	2	3	2	2	2	2
77	1	1	4	4	3	2	4	2	4	5	4	3	2	3	3	2	4	4	5	2	3	4	6	4	2	4	2	3	2	3	3	3	4	4	3	4	4	3	2	5	2	2	2	4
1910	0	0
75	1	1	4	2	4	4	4	2	4	4	5	3	2	4	4	2	4	4	3	2	2	2	5	4	2	4	2	4	2	4	5	5	2	2	4	4	2	4	5	3	2	2	1	2
94	1	1	4	3	3	3	3	3	4	4	3	4	3	3	3	2	4	3	2	2	2	2	3	4	2	4	2	4	2	3	4	3	4	3	3	4	2	3	3	2	2	2	2	2
158	1	1	3	4	2	4	3	3	3	3	4	4	4	2	4	4	4	2	3	3	2	2	2	4	3	3	2	2	3	3	2	4	4	4	2	4	4	3	2	3	3	2	2	2
165	1	1	2	4	2	3	3	2	3	2	4	3	3	2	2	3	1	1	6	1	3	3	5	3	2	4	3	4	3	4	3	4	2	3	2	3	4	4	3	3	2	3	5	6
163	2	1	2	4	2	4	2	4	4	5	4	3	3	4	3	3	4	4	6	4	4	6	5
112	1	1	4	3	3	3	3	2	3	4	4	3	3	3	2	1	5	3	4	3	2	3	4	4	3	4	3	2	2	3	3	4	4	4	3	2	2	3	2	3	2	2	2	5
152	1	1	4	3	2	5	2	4	4	4	3	3	3	2	3	3	4	3	5	5	4	3	5	3	3	3	3	2	4	4	4	4	4	3	3	3	3	3	3	5	4	3	5	6
182	1	0	2	4	2	4	2	4	4	4	4	3	3	4	3	3	3	4	3	3	3	5	5	2	4	3	4	2	3	3	3	4	3	3	3	3	3	3	3	3	3	3	3	5
132	1	1	3	2	2	4	3	2	5	5	5	4	4	3	3	2	4	4	3	6	3	3	5	4	2	4	3	2	2	3	3	4	4	3	3	3	3	4	3	3	2	2	2	3
83	1	1	2	4	2	3	3	4	2	2	3	4	4	1	5	5	3	1	6	5	3	2	5	3	3	3	3	4	3	3	3	3	3	3	2	2	3	3	2	6	6	3	5	5
881	1	1	4	2	4	3	3	2	4	5	2	4	2	1	2	3	4	3	5	3	3	3	2	4	2	4	2	4	2	3	4	2	4	2	2	3	4	3	2	6	3	2	3	2
10	1	1	4	2	4	2	4	2	3	3	3	4	4	2	4	4	3	3	2	2	2	2	6	4		4	2	4	2	2	2	3	4	5	2	4	4	3	1	1	1	1	1	7
159	1	1	4	2	4	2	4	2	4	4	4	3	2	3	3	2	4	4	7	5	5	6	6	3	2	4	3	4	2	4	4	4	3	2	3	3	2	4	4	7	6	5	6	6
212	0	0
63	1	1	4	2	5	1	4	1	3	2	5	4	3	2	4	4	2	2	2	1	3	3	6	5	1	1	1	5	1	2	3	5	4	4	2	4	3	2	3	3	2	3	1	5
136	1	1	4	2	4	2	1	2	4	4	4	4	3	2	3	3	3	2	5	5	3	5	6	4	2	4	2	2	2	4	4	4	5	3	2	3	3	4	2	6	3	3	5	5
11	1	1	5	2	4	2	4	2	5	5	4	4	2	3	1	5	5	5	1	1	1	1	1	5	1	5	1	4	1	5	5	4	4	2	3	2	4	5	4	1	1	1	1	1
1110	1	1	4	2	4	2	4	2	3	3	2	4	4	2	4	4	3	2	4	4	3	3	4	4	2	4	2	4	2	2	2	2	4	4	2	3	3	3	2	4	4	2	3	4
32	1	1	4	3	3	3	2	2	3	3	4	4	3	3	3	3	3	2	3	3	3	3	5	4	3	3	2	4	2	2	2	3	4	3	3	3	3	2	3	3	2	3	3	4
58	0	1
211	0	0
198	0	0
46	0	0
142	1	1	3	4	2	4	2	4	3	3	4	3	3	3	3	2	3	4	3	2	3	3	6	4	3	2	4	2	3	3	3	4	3	3	4	3	2	3	3	5	3	3	5	5
38	1	1	4	3	4	3	2	3	1	2	3	4	4	2	5	4	3	2	3	2	2	3	5	4	4	2	4	2	2	3	2	3	3	4	3	4	4	3	1	3	2	2	3	5
122	0	1
168	0	1
69	2	0	5	1	3	4	4	4	3	4	4	3	2	2	4	3	4	4	4	5	3	4	3
161	1	1	4	4	4	3	2	3	3	4	3	3	2	2	3	2	2	2	3	1	5	5	6	4	4	4	2	2	3	3	4	4	3	3	3	3	2	3	2	3	1	3	4	5
161	1	1	4	2	4	2	4	2	3	2	3	4	3	1	4	4	3	1	2	2	2	3	2	4	4	4	2	2	3	3	4	4	3	3	3	3	2	3	2	3	1	3	4	5
161	1	1	4	4	4	3	2	3	3	4	3	3	2	2	3	2	2	2	3	1	5	5	6	5	2	4	2	5	1	3	2	3	5	4	1	4	4	4	2	1	1	1	2	3
161	1	1	4	2	4	2	4	2	3	2	3	4	3	1	4	4	3	1	2	2	2	3	2	5	2	4	2	5	1	3	2	3	5	4	1	4	4	4	2	1	1	1	2	3
196	0	0
209	0	0
204	0	0
145	1	1	4	3	2	4	3	2	3	3	4	4	4	2	4	4	2	2	2	3	2	2	3	4	2	4	2	3	2	2	2	3	4	4	1	4	4	2	2	2	2	2	2	2
6	1	1	4	3	3	2	2	2	2	3	5	4	4	3	4	3	1	3	2	2	2	3	2	4	3	2	1	4	1	5	3	3	3	3	3	2	3	3	3	3	2	2	3	4
310	1	1	5	4	4	1	1	3	5	5	5	3	3	3	2	3	5	5	6	3	4	4	7	4	3	4	2	3	1	3	2	4		4	3	4	5	3	3	3	3	2	3	7
133	1	1	4	3	3	3	3	3	2	2	2	5	4	1	5	4	3	2	3	1	1	1	2	4	2	2	2	3	3	2	2	3	5	5	2	5	4	2	1	2	2	2	2	2
215	0	0
221	0	0
21	0	0
176	0	1
44	1	1	3	2	5	3	4	2	3	3	3	4	4	2	4	4	3	2	5	2	2	2	6	4	2	4	2	5	2	3	3	2	4	5	2	4	3	5	1	3	1	2	3	5
9	1	1	4	2	4	2	2	1	4	5	4	3	3	3	4	3	2	3	2	3	2	3	2	4	2	2	3	4	3	3	3	3		2	2	4	4	2	2	2	2	1	1	1
126	1	1	5	2	4	2	4	2	1	1	3	4	5	2	3	4	1	2	2	1	3	2	3	4	1	4	1	4	2	2	3	3	5	5	1	3	4	2	2	1	2	2	3	2
219	0	0
71	1	1	4	3	3	2	4	2	3	3	5	4	4	4	4	3	3	4	4	3	2	3	3	5	2	4	2	4	2	2	2	5	4	3	4	4	3	2	3	3	2	2	2	2
34	1	1	2	4	2	4	3	4	5	2	4	3	2	4	3	2	5	5	5	2	4	5	7	2	4	2	4	1	5	4	5	5	3	3	4	3	2	4	3	5	2	3	4	6
74	1	1	4	3	2	3	4	3	3	3	3	3	4	3	3	3	3	3	2	2	1	2	1	3	2	4	3	4	3	2	4	3	4	4	3	3	3	3	2	2	2	2	3	2
62	1	1	3	4	3	4	2	3	4	5	5	3	2	5	2	2	5	5	5	5	5	2	6	3	4	2	4	2	3	4	4	5	3	1	5	2	3	4	5	6	6	6	5	6
115	1	1	2	4	2	4	2	4	4	4	5	2	2	4	1	1	4	4	5	6	6	6	5	2	4	2	2	2	4	4	4	5	3	2	3	3	2	4	4	6	6	6	4	6
118	1	1	3	4	3	4	2	3	2	3	3	4	3	3	3	3	3	3	3	2	3	5	6	2	4	3	4	2	4	3	3	3	3	3	3	3	3	3	2	5	3	5	6	6
48	1	1	3	2	4	3	2	3	4	5	5	2	3	3	3	3	5	3	5	3	6	5	6	4	4	5	2	2	3	4	5	5	3	2	4	3	3	5	3	6	5	5	5	6
45	1	1	5	2	4	2	3	5	3	3	3	5	4	1	4	5	3	1	2	2	1	2	1	5	2	5	1	4	1	3	3	4	4	4	2	4	4	2	1	2	2	1	1	2
43	1	1	4	2	4	2	3	2	3	2	4	4	3	2	4	4	3	1	3	5	3	4	6	4	2	4	2	4	2	2	2	3	3	4	3	4	3	2	1	4	3	3	2	6
175	1	1	2	4	2	4	2	2	2	2	4	3	3	2	4	2	3	2	5	5	5	3	6	4	4	4	4	4	3	3	3	4	3	3	3	4	3	3	2	5	5	4	3	3
42	1	0	3	3	2	4	2	3	5	5	5	3	3	4	2	3	3	3	4	4	4	4	4	4	3	3	3	3	3	4	4	4	4	4	3	2	4	5	2	4	4	4	4	4
153	1	0	3	2	2	2	3	2	5	4	5	3	2	4	3	2	5	5	5	5	4	4	4	3	3	4	3	4	3	4	4	5	3	2	5	3	3	4	5	6	1	4	3	2
39	1	1	4	4	2	4	5	4	3	4	5	4	2	5	2	1	4	4	5	5	6	3	7	2	2	4	4	5	4	3	4	5	3	3	5	2	2	4	5	5	3	3	2	6
14	1	1	4	4	4	2	4	2	3	3	4	3	4	3	3	4	3	3	2	2	2	2	2	4	2	2	3	2	2	2	2	3	3	3	2	3	4	3	2	3	3	3	3	3
192	0	0
52	1	1	3	4	3	4	3	3	4	4	5	2	3	3	3	3	3	4	5	4	4	4	3	3	4	2	3	3	3	4	4	5	3	2	3	3	2	3	4	4	4	3	3	4
88	2	1	4	3	3	3	2	3	2	3	2	3	3	3	2	2	4	3	5	3	3	5	5
169	1	1	4	4	2	4	4	2	3	3	5	3	4	3	4	4	4	4	3	5	5	2	4	1	1	5	2	5	4	2	2	3	4	5	2	4	5	2	1	1	2	1	1	1
172	2	1	4	1	4	2	4	2	2	4	3	4	3	1	4	2	3	2	6	5	7	7	6
127	0	1
155	1	1	3	4	3	3	3	4	3	3	4	4	3	3	3	2	3	3	2	2	2	3	4	3	3	3	3	4	3	3	3	4	4	3	3	4	4	4	4	3	2	2	2	5
61	0	1
410	2	0	5	2	4	2	4	2	1	2	2	5	5	2	4	5	2	2
1310	1	1	3	4	2	3	2	2	4	4	5	3	3	3	2	3	4	3	5	5	4	3	5	3	3	2	4	3	3	5	5	4	4	2	3	3	3	5	4	4	4	4	3	6
2	1	1	2	3	4	2	3	2	4	4	5	4	3	3	4	2	3	3	3	2	2	3	4	3	3	3	4	4	4	4	3	4	4	4	3	3	2	5	4	2	2	2	2	2
67	1	1	4	4	2	2	4	2	2	4	4	4	3	2	2	1	2	3	3	3	1	2	1	4	2	4	2	3	3	4	2	3	4	3	5	2	1	4	2	5	2	1	1	1
156	1	1	4	4	2	2	2	2	3	1	3	4	4	1	5	4	1	1	5	3	3	2	2	4	2	2	2	4	2	2	2	3	4	4	2	4	4	3	1	2	2	2	2	2
167	1	1	3	4	4	3	2	3	3	4	5	4	4	3	3	3	3	3	3	3	2	2	2	3	3	3	2	3	4	3	4	5	3	4	3	3	4	4	3	2	3	2	2	6
5	1	1	5	4	1	2	4	4	3	4	5	3	4	4	3	2	2	5	1	1	1	1	1	5	1	4	2	5	1	2	2	4	5	5	3	4	4	2	2	1	1	1	1	1
35	1	1	5	1	5	1	4	1	2	1	2	5	5	2	5	5	2	2	2	2	2	2	2	5	1	5	1	5	1	2	1	3	5	5	1	5	5	1	1	1	1	1	1	1
65	1	1	2	4	2	4	2	3	3	4	3	3	3	4	3	3	3	3	5	6	4	3	4	4	2	4	3	3	2	2	2	3	4	4	2	4	4	2	2	4	4	4	4	5
8	1	1	5	2	5	2	4	2	3	3	3	4	4	2	5	5	2	2	2	1	2	2	2	4	2	4	1	4	1	3	3	3	4	4	2	4	4	2	3	2	2	2	2	2
129	1	1	4	3	2	4	2	3	3	4	4	3	3	4	2	3	3	2	3	2	2	5	3	4	2	2	3	4	3	4	4	5	3	3	4	3	3	2	2	4	3	2	3	2
78	1	1	4	3	3	3	3	3	4	4	5	3	3	2	3	4	4	3	6	4	3	2	5	3	2	4	2	4	3	3	3	3	4	3	2	3	4	4	3	3	3	2	2	4
1	0	1
207	0	0
174	1	1	3	3	4	3	4	2	4	3	4	4	3	2	3	3	3	2	4	3	3	3	4	3	2	4	3	4	3	3	3	3	3	3	3	3	3	3	3	4	4	4	4	4
37	1	1	3	4	3	3	4	3	5	5	5	3	2	4	2	3	3	3	6	5	7	5	6	4	4	4	3	4	2	2	4	3	3	2	2	2	4	4	2	6	5	6	5	6
91	1	1	5	3	4	2	4	2	2	3	4	4	4	2	4	4	2	3	1	1	1	1	1	5	3	5	1	5	2	3	4	4	4	5	2	4	4	2	2	2	1	1	1	2
51	1	1	2	3	2	4	2	2	3	4	5	3	4	5	3	3	5	5	5	5	5	3	7	3	2	3	2	2	4	4	5	4	3	3	3	3	4	5	3	3	3	2	2	5
111	0	1
55	1	1	4	2		2	4	2	3	3	4	2	2	2	3	3	3	2	3	3	3	3	5	4	2	4	2	2	2	3	2	2	5	4	2	4	4	3	3	3	3	3	5	5
54	1	1	2	4	1	5	2	2	5	4	5	3	3	2	3	4	5	3	6	5	3	3	6		4	2	4	2	2	5	4	5	3	3	2	2	4	4	2	5	3	3	3	5
189	0	1
117	1	1	2	3	3	4	2	4	5	5	5	3	4	3	4	4	5	3	3	1	2	2	3	3	4	2	4	3	4	3	4	4	4	4	3	4	3	5	3	3	2	3	2	2
162	1	1	5	2	5	1	4	2	3	3	3	4	4	2	5	3	3	1	6	5	5	5	7	4	3	4	2	4	2	4	2	3	5	4	2	4	4	4	2	3	3	2	2	2
84	1	1	4	4	2	3	4	4	3	4	3	2	4	2	2	2	5	4	5	5	3	1	5	2	4	2	2	2	4	3	5	4	1	1	3	1	2	3	3	7	7	6	4	6
121	1	1	2	4	2	4	2	4	4	5	3	3	3	4	4	4	5	2	2	1	1	5	5	4	2	2	2	2	2	5	2	5	4	3	3	3	3	4	3	2	1	2	2	5
191	0	0
119	0	1
113	1	1	5	1	4	1	4	1	3	4	3	4	4	3	4	3	2	2	4	5	2	3	4	4	2	4	2	4	2	2	3	4	4	3	3	4	2	2	4	5	5	3	1	2
114	1	1	5	4	3	3	3	3	4	3	3	3	3	3	3	3	3	3	4	4	4	4	4	5	3	3	2	3	3	3	4	4	4	3	2	3	4	3	3	4	4	4	4	2
53	0	1
19	1	1	4	2	4	2	4	3	2	4	2	2	3	2	3	4	3	3	3	2	3	6	3	4	2	4	2	4	1	2	2	3	4	3	1	4	4	3	1	3	3	5	6	4
141	1	0	2	2	2	4	2	4	3	4	5	3	3	3	3	3	4	2	3	3	3	3	5	3	4	3	3	2	3	4	3	4	3	3	3	3	4	4	3	3	3	3	3	2
173	1	1	4	2	4	2	2	2	2	4	4	3	1	3	3	2	4	3	6	4	5	5	5	4	2	4	2	2	2	3	3	4	4	2	2	4	3	3	2	6	5	5	3	5
194	0	0
199	0	0
138	0	1
1710	0	1
146	1	1	3	2	3	3	2	2	3	3	3	4	4	3	3	3	3	2	2	2	1	2	2	4	2	3	2	2	3	4	3	4	4	3	2	4	3	3	2	2	2	2	2	4
13	1	1	4	3	4	2	4	3	4	4	4	4	3	3	3	3	3	4	5	3	3	3	3	4	2	3	2	2	2	3	3	4	4	3	3	4	4	3	3	3	3	3	3	3
89	1	1	3	4	3	4	2	3	3	4	5	3	2	4	3	2	5	5	5	2	2	3	5	4	2	4	2	4	2	4	3	4	3	2	3	3	2	3	4	7	3	3	4	6
154	1	1	4	2	5	2	4	2	3	3	4	5	3	3	4	3	4	3	2	1	1	2	2	4	2	5	2	4	2	3	3	2	4	5	2	4	4	3	1	2	1	1	1	2
93	1	1	2	2	2	3	3	2	3	2	3	3	3	1	3	4	2	1	3	2	2	2	3	4	2	4	3	3	2	3	2	3	4	4	2	4	5	2	2	2	2	2	2	4
68	1	1	4	4	2	4	2	5	4	5	5	3	3	4	3	2	3	3	5	4	5	3	6	2	5	2	4	4	4	2	4	4	3	3	4	3	2	4	5	7	6	6	4	5
151	1	1	2	4	2	4	3	3	2	2	3	3	3	4	3	4	2	3	2	1	2	2	5	2	4	2	4	2	4	3	4	3	4	4	2	4	4	2	2	2	1	2	2	3
26	1	1	3	4	3	4	2	4	3	3	4	3	3	2	4	3	3	2	1	1	1	1	1	4	3	4	2	2	3	4	2	5	4	3	1	3	3	1	1	1	1	1	1	1
910	1	1	5	2	4	2	4	1	2	2	2	5	3	1	5	4	1	1	1	1	1	1	2	5	2	4	1	4	1	3	3	3	5	3	1	4	3	3	1	2	2	2	1	3
97	1	1	4	2	3	3	3	2	5	5	5	3	2	3	3	2	5	5	4	4	4	4	2	3	3	3	3	3	3	4	4	1	2	3	4	4	3	2	1	2	3	4	4	5
147	1	1	4	2	4	2	3	2	2	2	3	4	4	2	3	4	3	1	4	2	2	3	5	4	2	4	2	3	2	3	2	3	4	3	3	4	4	4	2	2	2	2	3	4
208	0	0
131	1	1	4	3	4	2	4	2	3	4	4	3	3	2	3	4	3	2	3	3	2	2	2	4	2	5	2	4	2	3	3	4	5	4	2	3	4	3	2	2	2	1	1	2
1210	1	1	3	3	4	4	3	4	4	4	5	3	3	4	3	2	4	3	5	2	3	2	2	2	4	2	4	4	4	3	4	5	3	3	4	2	2	5	5	4	2	3	2	4
73	0	1
810	1	1	5	2	4	2	2	1	4	5	5	3	3	3	4	3	4	3	5	1	2	2	5	4	2	4	2	4	1	2	2	2	5	4	1	4	5	3	1	1	1	1	1	2
125	1	1	4	4	3	2	3	3	3	4	4	4	3	3	4	3	4	3	3	3	6	5	6	4	3	3	3	3	3	3	3	4	3	3	3	4	3	3	2	3	2	4	3	4
98	0	1
18	1	1	4	2	4	2	3	2	3	2	4	4	3	2	4	5	1	1	3	3	3	4	4	4	3	4	2	4	2	3	3	4	4	3	3	4	4	2	2	4	5	3	4	5
76	1	1	2	3	3	2	2	2	3	4	4	3	5	3	3	3	5	3	6	6	3	3	5	4	2	3	3	4	2	4	4	4	4	3	5	3	3	3	3	5	5	4	4	6
188	1	1	4	3	4	2	2	1	2	3	2	4	5	2	4	5	1	1	5	4	1	2	6	4	3	2	2	3	2	2	2	3	4	5	2	4	4	3	1	2	2	2	2	6
1810	1	1	4	2	4	2	4	2	3	4	5	4	3	1	4	4	3	3	2	5	2	3	4	4	2	4	2	4	2	3	3	3	3	3	5	3	3	3	3	2	2	2	2	2
181	1	1	4	3	4	3	2	2	2	3	2	3	3	1	5	3	1	1	2	2	2	3	2	4	3	4	2	2	2	2	2	3	3	4	2	5	3	1	2	2	2	3	3	4
1875	1	1	5	3	4	4	3	4	3	3	4	4	5	3	4	4	3	2	3	3	2	2	2	4	2	4	2	3	2	3	3	3	4	4	3	4	4	3	3	2	2	2	3	3
139	1	1	4	4	3	2	3	2	4	4	5	4	4	2	3	3	4	2	3	2	2	2	2	4	2	4	2	4	2	4	3	4	4	3	3	4	3	3	3	3	3	3	3	2
57	1	1	4	1	4	2	4	2	1	1	1	1	4	1	5	4	1	1	1	1	1	5	7	4	1	4	1	4	4	1	1	1	4	4	2	4	4	1	1	1	1	1	1	7
206	0	0
164	1	1
225	1	2	4	2	4	1	4	2	2	2	3	5	3	1	4	3	2	1	2	1	1	2	6	5	2	4	2	5	2	3	2	4	4	4	2	4	3	2	2	2	1	2	2	5
2210	1	2	4	2	4	2	4	2	3	4	4	4	3	3	2	4	4	2	3	2	2	3	5	4	2	3	3	4	4	4	3	5	4	4	2	5	4	3	3	3	1	1	2	3
229	1	2	5	1	4	1	2	2	4	5	5	2	3	3	2	2	4	4	6		5	2	2	3	4	3	3	2	3	5	5	5	1	1	1	1	1	5	5	7	5	6	2	2
228	1	2	1	2	4	2	3	1	3	4	5	5	3	2	3	3	2	2	2	2	2	1	2	5	2	4	2	4	1	2	2	5	5	4	3	4	3	2	2	2		2	1	2
227	1	2	3	3	3	3	2	3	4	3	4	3	3	3	3	3	4	4	5	5	4	3	4	3	4	3	3	3	3	3	3	4	3	3	3	3	3	4	4	5	3	4	5	3
226	1	2	4	2	2	3	2	5	3	2	3	3	2	2	4	2	2	2	5	5	5	3	2	2	2	2		2	3	4	4	4	3	2	3	3	1	3	3	7	4	5	1	3
231	1	2	4	2	4	2	2	2	3	3	4	3	3	3	4	3	3	2	3	2	3	3	6	4	2	4	2	2	2	3	2	4	3	3	3	3	3	3	2	3	3	3	3	6
232	1	2	4	2	3	2	3	2	5	3	3	4	5	3	4	4		3	2	2	2	3	5	4	4	4	4	2	2	3	4	4	4	4	3	4	4	3	3	3	3	2	3	2
233	1	2	3	3	3	4	3	3	3	4	4	4	3	2	4	3	3	2	2	2	2	1	2	3	3	2	2	2	2	3	4	2	3	4	3	4	3	4	3	2	2	2	2	3
234	1	2	3	1	4	2	4	2	3	4	3	3	3	3	4	2	4	3	6	2	3	2	3	4	2	4	2	4	1	3	3	4	3	3	3	2	2	3	3	3	2	2	3	2
235	1	2	4	2	4	2	2	2	2	3	3	5	4	2	5	4	2	2	2	2	2	2	2	5	2	4	4	4	1	2	2	3	5	4	2	5	4	3	2	2	2	2	3	2
2310	1	2	4	4	2	4	2	2	4	4	4	3	2	3	3	3	3	3	6	6	5	5	6	4	4	2	2	2	4	4	5	5	4	2	4	2	3	4	4	6	6	6	6	2
239	1	2	4	2	4	2	2	2	3	4	4	3	3	2	4	4	5	3	4	4	3	3	3	4	2	4	2	4	2	4	4	3	4	3	3	3	3	4	3	3	3	2	2	2
238	1	2	3	3	4	2	3	2	3	3	4	3	3	3	2	3	4	2	5	4	6	6	6	2	2	3	2	3	3	3	3	4	3	3	3	2	3	4	2	6	4	6	6	7
237	1	2	4	2	4	3	2	2	4	4	3	4	3	3	3	2	4	2	6	6	6	3	7	4	2	2	2	2	2	4	3	5	3	3	4	1	3	4	2	6	3	7	4	6
236	1	2	5	1	5	1	3	2	2	2	3	5	3	2	5	4	3	2	7	5	6	6	7	4	1	4	1	4	1	3	2	2	4	3	2	4	4	3	1	7	6	5	6	7
241	1	2	4	3	4	4	3	3	3	2	4	4	4	2	4	3	3	3	3	2	2	2	3	4	3	4	3	4	2	4	2	4	4	4	2	3	4	3	2	2	2	2	2	3
242	1	2	5	1	1	1	4	1	2	4	5	4	3	2	4	3	3	2	1	2	1	1	2	5	1	2	2	4	2	2	3	3	4	3	2	4	5	3	2	1	1	1	1	2
243	1	2	4	2	4	2	2	2	4	5	4	4	3	2	3	2	3	2	3	3	2	2	2	5	3	5	1	2	2	4	5	4	3	2	3	3	2	3	1	2		2	2	2
244	1	2	2	4	2	4	4	3	3	3	5	3	4	2	4	4	3	3	3	1	1	1	1	3	3	3	4	2	3	3	3	4	3	3	2	3	3	3	2	2	2	2	2	2
245	1	2	3	4	3	3	2	3	4	4	5	3	2	3	3	3	4	3	6	4	4	5	7	2	4	2	4	2	3	4	4	4	3	2	3	3	2	4	3	3	5	5	4	6
2410	1	2	4	3	4	2	2	2	3	3	2	5	4	3	4	4	3	2	2	2	3	2	5	4	3	4	2	3	2	3	2	2	5	4	2	4	5	3	2	1	2	2	2	2
249	1	2	4	3	4	2	3	3	4	5	5	3	4	3	2	4	4	2	3	3	4	3	3	4	4	4	3	4	3	5	5		4	4	3	2	2	5	3	2	2	3	2	1
248	1	2	5	2	5	2	3	2	2	1	4	4	3	2	4	4	2	2	4	3	4	3	5	5	2	4	2	3	1	2	2	3	4	3	2	4	4	3	1	3	2	3	3	2
247	1	2	4	2	3	3	4	3	2	3	3	4	4	1	5	4	2	1	2	3	3	3	7	4	2	3	3	4	3	2	4	2	4	4	1	4	4	1	1	3	3	3	3	6
246	1	2	4	2	4	2	4	2	3		3	2	4	2	4	4	2	2	2	2	2	2	2	4	2	4	2	3	2	3	3	2	3	3	2	3	4	3	2	3	2	2	2	3
251	1	2	4	2	2	4	2	4	5	5	5	3	3	4	3	2	4	5	3	4	4	2	5	4	3	4	2	3	2	5	4	4	4	4	4	4	4	4	4	3	2	1	1	1
252	1	2	3	4	4	4	2	4	3	2	3	4	4	2	3	3	3	2	3	2	2	3	6	3	3	2	4	2	3	3	2	3	4	3	1	4	3	2	2	3	2	2	6	6
253	1	2	4	2	4	4	2	2	4	4	4	3	2	4	3	3	3	3	6	6	3	5	3	4	2	4	2	2	3	4	4	5	3	3	3	3	3	4	4	2	6	4	5	5
254	1	2	5	2	4	2	4	2	2	2	3	5	4	2	4	4	2	1	2	1	1	1	2	4	2	2	2	5	2	2	2	3	5	4	2	4	4	1	2	1	2	1	2	3
255	1	2	4	2	4	2	4	2	4	4	5	4	3	2	3	5	4	4	3	4	4	3	1	2	4	3	4	3	2	3	4	5	4	3	2	4	3	4	4	6	5	4	6	6
2510	1	2	3	4	2	4	4	4	3	4	4	4	4	3	3	4	2	3	4	5	4	1	2	3	4	4	4	3	4	3	4	4	4	3	3	4	4	3	2	2	3	2	2	3
259	1	2	5	2	4	2	4	1	2	2	3	5	4	2	4	4	2	2	1	1	1	2	2	5	2		4	4	2	2	2	2	1	5	2	4	5	2	2	1	2	1	1	2
258	1	2	4	4	2	3	2	3	3	2	3	2	3	4	3	2	3	3	5	4	4	3	5	3	4	3	3	2	3	5	5	5	2	2	4	5	2	2	2	4	3	3	2	3
257	1	2	3	2	4	2	2	3	5	5	5	4	3	5	3	3	4	5	3	2	3	3	2	5	1	4	2	4	2	2	2	3	4	4	2	4	4	3	2	4	3	2	2	3
256	2	2	4	4	4	2	3	2	3	2	3		4	2	4	4	2	2	2	2	2	2	3

## Sheet: Key
Questionnaire	Probe
BRS	I tend to bounce back quickly after hard times.		BRS
BRS	I have a hard time making it through stressful events.		Response	Code
BRS	It does not take me long to recover from a stressful event.		Strongly Disagree	1
BRS	It is hard for me to snap back when something bad happens.		Disagree	2
BRS	I usually come through difficult times with little trouble.		Neutral	3
BRS	I tend to take a long time to get through set-backs in my life.		Agree	4
PSS	In the last month, how often have you been upset because of something that happened unexpectedly?		Strongly Agree	5
PSS	In the last month, how often have you felt that you were unable to control the important things in your life?
PSS	In the last month, how often have you felt nervous and "stressed"?		PSS
PSS	In the last month, how often have you felt confident about your ability to handle your personal problems?		Response	Code
PSS	In the last month, how often have you felt that things were going your way?		Never	1
PSS	In the last month, how often have you found that you could not cope with all the things that you had to do?		Almost Never	2
PSS	In the last month, how often have you been able to control irritations in your life?		Sometimes	3
PSS	In the last month, how often have you felt that you were on top of things?		Fairly Often	4
PSS	In the last month, how often have you been angered because of things that were outside of your control?		Very Often	5
PSS	In the last month, how often have you felt difficulties were piling up so high that you could not overcome them?
SWLS	In most ways my life is close to my ideal.		SWLS
SWLS	The conditions of my life are excellent.		Response	Code
SWLS	I am satisfied with my life.		Strongly Agree	1
SWLS	So far I have gotten the important things I want in life.		Agree	2
SWLS	If I could live my life over, I would change almost nothing.		Slightly Agree	3
			Neighter agree nor disagree	4
			Slightly Disagree	5
			Disagree	6
			Strongly Disagree	7
